# Supplementary material for: Assessment of variability of the thermohaline structure and transport of Atlanticwater in the Arctic Ocean based on NABOS CTD data
Source: Copernicus journal article supplement (doi:10.5194/os-2019-54), 2019-06-03
Supplement: Supplementary file [file os-2019-54-EC1-supplement.pdf]

1 **Assessment of variability of the thermohaline structure and transport of**  
2 **Atlantic water in the Arctic Ocean based on NABOS CTD data**

3 Nataliya Zhurbas<sup>1</sup> and Natalia Kuzmina<sup>1</sup>

4 <sup>1</sup>Shirshov Institute of Oceanology, Russian Academy of Sciences, 36 Nakhimovsky Prospekt ,  
5 117997 Moscow, Russia

6 *Correspondence to:* Nataliya Zhurbas (nvzhurbas@gmail.com)

7

8 **Abstract.** Data of CTD transects across continental slope of the Eurasian Basin and the St. Anna  
9 Trough performed during NABOS (Nansen and Amundsen Basins Observing System) project in  
10 2003–2015 **are** used to assess transport and propagation features of the Atlantic Water (AW) in  
11 the Arctic Ocean. Estimates of  $\theta$ - $S$  **indices** and volume flow rate of the current carrying the AW  
12 in the Eurasian Basin **were** obtained. The assessments were based on the analysis of CTD data  
13 including 33 sections in the Eurasian Basin, 4 transects in the St. Anna Trough and 2 transects in  
14 the Makarov Basin; additionally a CTD transect of the PolarStern-1996 expedition (PS-96) was  
15 considered. Using spatial distributions of temperature, salinity, and density on the transects and  
16 applying  $\theta$ - $S$  analysis, the variability of thermohaline pattern on the AW pathway along the slope  
17 of Eurasian Basin was investigated. The Fram Strait branch of the Atlantic Water (FSBW) was  
18 ~~satisfactorily~~ identified on all transects, including two transects in the Makarov Basin (along  
19 159°E), while the cold waters, which can be associated with the influence of the Barents Sea  
20 branch of the Atlantic water (BSBW), on the transects along 126°E, 142°E and 159°E, were  
21 observed in the depth range below 800 m and had a negligible effect on the spatial structure of  
22 isopycnic surfaces. Special attention was paid to the variability of the volume flow rate of the  
23 AW propagating along the continental slope of the Eurasian Basin. The geostrophic volume flow  
24 rate was calculated using the dynamic method. An interpretation of the spatial and temporal  
25 variability of hydrological parameters characterizing the flow of the AW in the Eurasian Basin is  
26 presented. The geostrophic volume flow rate decreases significantly farther away from the areas  
27 of the AW inflow to the Eurasian Basin. Thus, the geostrophic estimate of the volume rate for  
28 the AW flow in the Makarov Basin at 159°E was found to be more than an order of magnitude  
29 smaller than the estimates of the volume flow rate in the Eurasian Basin, implying that the major  
30 part of the AW entering the Arctic Ocean circulates cyclonically within the Nansen and  
31 Amundsen Basins. There is an absolute maximum of  $\theta_{max}$  (AW core temperature) in 2006–2008  
32 time series and a maximum in 2013, but only at 103°E. Salinity  $S(\theta_{max})$  (AW core salinity) time  
33 series display an increase of the AW salinity in 2006–2008 and 2013 (at 103°E) that can be  
34 referred to as a AW salinization in the early 2000-ies. The maxima of  $\theta_{max}$  and  $S(\theta_{max})$  in 2006-  
35 2008 and 2013 were accompanied by the volume flow rate highs. **Additionally the time average**  
36 **volume rates were calculated for the FSBW flow** (in the longitude range 31–92°E), for the  
37 BSBW flow in the St. Anna Trough and for a combined FSBW and BSBW flow in longitude  
38 range 94–107°E. **A detailed discussion of the results is presented.**

## 39 1. Introduction

40 It is well known (see, e.g., Aagaard, 1981; Rudels et al., 1994; Schauer et al., 1997; Rudels  
41 et al., 1999; Schauer et al., 2002; Rudels et al., 2006; Berzczynska-Möller et al., 2012; Rudels et

42 al., 2015; Rudels, 2015; Dmitrenko et al., 2015) that Atlantic water (AW) enters the Eurasian  
43 Basin in two ways: one part originates from the Greenland and Norwegian seas and flows to the  
44 Basin through the Fram Strait (Fram Strait branch of the Atlantic Water, hereinafter the FSBW  
45 in accordance with the terminology of the paper by Schauer et al. (1997)), and the other reaches  
46 the deep part of the Arctic Ocean near St. Anna Through after passing through the Barents Sea  
47 (Barents Sea branch of the Atlantic water, hereinafter the BSBW as in (Schauer et al., 1997)).  
48 After entering the Eurasian Basin the FSBW forms an eastward subsurface baroclinic boundary  
49 current with a core of increased temperature and salinity adjacent to the continental slope. In the  
50 longitude range of 80–90°E it encounters and partially mixes with the BSBW, which is strongly  
51 cooled due to mixing with shallow waters of the Arctic shelf seas. Further, the water masses  
52 resulting from the interaction of two branches which transport the AW continue spreading  
53 cyclonically in the Eurasian Basin, following the sea bed topography.

54 To study the characteristics of the FSBW and BSBW flow in the Eurasian Basin, it is  
55 useful to estimate, first of all, its volume flow rate in different parts of the Basin. Generally the  
56 estimates of the AW volume flow rate have been based on observationally derived velocities  
57 (Fahrbach et al., 2001; Pnyushkov et al., 2011; Berzczynska-Möller et al., 2012; Rudels et al.,  
58 2014). However, to solve a number of fundamental and climatic problems it is worth considering  
59 the AW volume flow rate calculated on the basis of geostrophic (density-driven) velocity  
60 estimates. Such estimates can be more close to the real average estimates of the baroclinic  
61 volume flow rate since the velocity field in the ocean, in particular due to the internal waves and  
62 inertial oscillations, is usually more variable than the temperature, salinity and density fields.

63 To estimate the volume flow rate and thermohaline parameters of the AW, a large amount  
64 of CTD data is required. Obviously, the more complete the set of the considered sections the  
65 more accurate would be the estimates. Within the **NABOS project** (Nansen and Amundsen  
66 Basins Observing System) a unique array of CTD data was collected: more than 30 sections were  
67 made in various regions of the Arctic Basin in the years 2002–2015. Moreover, a number of  
68 sections in different years were made in the same regions of the Basin, which allows studying the  
69 temporal interannual variability of the thermohaline structure of water masses in these areas.

70 The main goal of this work is to investigate the spatial and temporal variability of the AW  
71 volume flow rate during its propagation along the continental slope of the Eurasian Basin using  
72 geostrophic estimates. Another important aspect of our analysis is the investigation of the  
73 thermohaline structure of the FSBW and BSBW and of its transformation. Large array of CTD  
74 data obtained using the NABOS program in 2002–2015 is used to get the results.

## 75 2. Material and Methods

76 In this study we used data of CTD profiling on transects across the slope of the Eurasian  
 77 Basin in the longitude range of 31–159°E measured in the years 2002–2015 within the  
 78 framework of NABOS project (in total 39 transects). The data are freely available at the site  
 79 <http://nabos.iarc.uaf.edu>. Apart from the NABOS data, a famous CTD transect across the whole  
 80 Eurasian Basin and over the Lomonosov Ridge starting at 92°E at the slope from R/V *Polarstern*  
 81 in 1996 (hereafter PS96) was also included. The location of the CTD transects is shown in Fig. 1.  
 82 It can be seen from the map in Fig. 1 that most of the CTD transects are aligned cross-slope and  
 83 grouped at longitudes of 31, 60, 90, 92, 94, 96, 98, 103, 126, 142, and 159°E. Four of the 40  
 84 transects crossed zonally the St. Anna Trough (at the latitude of 81, 81.33, 81.42, and 82°N)  
 85 through which the ~~Barents Sea Branch of the Atlantic Water (BSBW)~~ enters the Eurasian Basin.  
 86 Most of the CTD casts covered the upper layer from the sea surface to either 1000 m depth or to  
 87 the bottom (if the ~~depth of the sea~~ was less than 1000 m); some of the CTD casts (approximately  
 88 every third or fourth) covered the depths from the sea surface down to the sea bottom even if the  
 89 sea depth exceeded 1000 m.

90

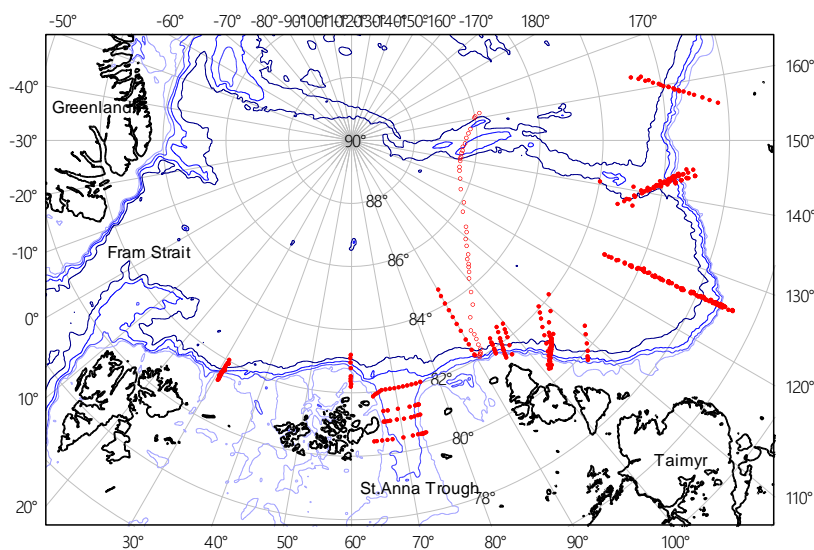

91

92 Fig.1. Bathymetric map of the Eurasian Basin with 300, 500, 1000, and 2000 m contours shown.  
 93 The red filled and blank circles are the locations of CTD stations on the NABOS and PS96  
 94 transects, respectively.

95 To estimate the strength of the ~~Fram Strait branch (FSBW)~~ or the ~~Barents Sea branch~~  
 96 ~~(BSBW)~~ or both branches of the Atlantic Water, we applied **classical geostrophic relations**

$$97 \quad \frac{\partial u}{\partial z} = \frac{g}{f\rho_0} \frac{\partial \rho}{\partial y}, \quad \frac{\partial v}{\partial z} = -\frac{g}{f\rho_0} \frac{\partial \rho}{\partial x}, \quad (1)$$

98 where  $u$  and  $v$  are velocity components along the  $x$  and  $y$  axes, respectively,  $g$  is the gravity  
 99 acceleration,  $f$  is the Coriolis parameter, and  $\rho$  and  $\rho_0$  are the density and reference density,  
 100 respectively;  $x, y, z$  is the right-hand triplet of orthogonal axes (e.g., the  $x$ ,  $y$ , and  $z$  axes are  
 101 directed east, north, and upward, respectively).

102 The choice of such a coordinate system is convenient for the stated task. Indeed,  
 103 assuming that the direction of the flow which transports AW is perpendicular to the transects  
 104 (that is, the flow is directed strictly along the slope), the first equation of Eqs. (1) was used to  
 105 calculate the flow velocity in the Eurasian basin. The second equation of Eqs. (1) was used to  
 106 estimate the flow velocity in the St. Anna Through.

107 The horizontal gradients of density,  $\partial\rho/\partial x$  or  $\partial\rho/\partial y$ , can be estimated from CTD  
 108 measurements (non-averaged data) on the transect providing the possibility to calculate vertical  
 109 gradients of velocity,  $\partial v/\partial z$  or  $\partial u/\partial z$  by Eqs. (1) and finally assess velocities  $u$  and  $v$  by  
 110 vertical integration.

111 The horizontal density gradients were determined on the basis of primary, **non-averaged**  
 112 CTD data, after which the vertical velocity gradients were calculated based on Eqs. (1), and then  
 113 the velocity values  $u(z, y)$  were obtained by vertical integration.

114 The main problem with geostrophic estimates of velocity from CTD transects lies in the  
 115 **uncertainty of choice of the no motion level** (the zero velocity depth ~~or the reference horizon~~). If  
 116 one expects that the baroclinic current occupies the upper layer or/and some intermediate layer  
 117 while the deep layer is relatively calm, the no motion depth level (or the reference horizon) can  
 118 be chosen somewhere in a supposedly calm deep layer (where the horizontal density gradient is  
 119 very small). On the contrary, in case of a near-bottom gravity flow, one would expect relative  
 120 stillness in the overlying layers, so the no motion depth level can be reasonably chosen  
 121 somewhere well above the near-bottom flow. The first situation is applicable to the FSBW,  
 122 which is a near-surface current when entering the Eurasian Basin and is transformed to  
 123 subsurface, intermediate-layer flow on its pathway along the slope of the Eurasian Basin. The  
 124 latter situation is applicable to the BSBW in the St. Anna Trough. In view of the above  
 125 considerations, we adopted for the no motion depth level either 1000 m depth or the sea bottom  
 126 depth if the latter was smaller than 1000 m for the FSBW, and some level in the vicinity of 50 m  
 127 depth, where density contours were more or less flat, for the observations of BSBW in the St.  
 128 Anna Trough (see also below). An additional argument in favor of such a choice of the no  
 129 motion depth level is that the CTD sections were made in the areas of Arctic Ocean covered with  
 130 ice, and, consequently, the elevations of the free surface due to convergence/divergence caused  
 131 by the heterogeneity of the Ekman wind transport, which could form the barotropic component

132 of the geostrophic flow,  absent: the ice cover extent of all sections, except for the  
133 southernmost section in the Laptev Sea, at 126°E, was estimated to be about 95%.

134 Another problem with the geostrophic estimates of velocity from non-averaged CTD-data  
135 is caused by vertical undulations of density contours on transect due to internal waves and  
136 mesoscale eddies that can cause large fluctuations of horizontal density gradients and, therefore,  
137 unrealistically high estimates of geostrophic velocities. The masking effect of internal waves and  
138 mesoscale eddies on geostrophic estimates of velocity is especially important for transects with  
139 closely spaced CTD casts, when the distance between neighbor casts is only a few kilometers  
140 (this is our case). However, the masking effect of internal waves and mesoscale eddies can be  
141 suppressed by integrating geostrophic velocities horizontally and vertically to get volume flow  
142 rate through the CTD transect. Indeed, to get correct estimates of geostrophic velocities, it is  
143 better not to use non-averaged data: it is useful to perform averaging and mapping the data on a  
144 regular grid. Selecting the optimal smoothing and regular grid mapping parameters in each  
145 specific case of a CTD section to determine geostrophic current velocities is beyond the scope of  
146 this paper: here we only present estimates of the volume flow rate calculated on the basis of a  
147 formal approach to the analysis of non-averaged CTD data which excludes the subjectivity of  
148 choice of averaging and mapping parameters.

149 Since the FSBW brings saline and warm water to the Eurasian Basin, the geostrophic  
150 estimates of the volume flow rate were found by integration over the depth range with positive  
151 temperature,  $\theta > 0$  °C, and relatively high salinity,  $S > 34.5$  psu, that is, some areas in the near-  
152 surface layer with warm and fresh water (which cannot be attributed to AW) were excluded. For  
153 the observations of BSBW in the St. Anna Trough the geostrophic estimates of the volume flow  
154 rate were found by integration over a depth range with the non-averaged temperature below 0 °C  
155 and the salinity above 34.5 psu. If both branches of AW were present on the transect, the  
156 integration was performed over the entire depth range except the cold near-surface layer ( $\theta < 0$   
157 °C) and the areas in the near-surface layer with warm ( $\theta > 0$  °C) and relatively fresh ( $S < 34.5$   
158 psu) water. The zero velocity depth in this case was chosen in accordance to the observed pattern  
159 of density contours, i.e. its resemblance with either the near-surface flow pattern or the near-  
160 bottom flow pattern (see Section 3 for details). For density  $\rho$  in Eqs. (1), the in situ water density  
161 depending on temperature, salinity and pressure was adopted. A detailed description of the  
162 method for geostrophic estimates of the AW volume flow rate is presented in the paper (Zhurbas  
163 N., 2019).

### 164 3. Results

#### 165 3.1. Variability of the thermohaline pattern on the AW pathway along the slope of Eurasian 166 Basin

##### 167 a. CTD transections analysis

168 First of all, let us focus on the transformation of thermohaline signatures (i.e. patterns of  
169 salinity  $S$ , potential temperature  $\theta$ , and potential density anomaly  $\sigma_\theta$ , calculated relative to the  
170 atmospheric pressure  $p_0 = 0$  dbar, versus cross-slope distance and depth) of the AW flow on its  
171 pathway along the slope of the Eurasian Basin. The potential density anomaly  $\sigma_\theta$  pattern was of  
172 primary interest, since it determines the geostrophic estimate of the AW transport (the values of  
173 hydrological parameters and volume flow rates estimated for different areas of the AW flow  
174 based on empirical data are presented in the table in Section 3.2).

175 **Fig. 2 shows** temperature, salinity, and potential density anomaly versus cross-slope  
176 distance and depth from transect at 31°E, made in 2008. ~~As it can be seen in Fig. 2,~~ the contours  
177 of  $\sigma_\theta$  diverge towards the continental slope margin (to the south), shallowing above the  
178 warm/saline core of the AW and sloping down beneath it, which in terms of geostrophic balance  
179 corresponds to the eastward subsurface flow. Such a structural feature of the distribution of  
180 isopycnic surfaces was observed on all NABOS transects taken across available continental  
181 slope at 31°E. According to Fig. 2 the warm/saline core of the Fram Strait Branch of the AW  
182 with the maximum temperature  $\theta_{max}$  of 4.88°C at the depth  $Z_{\theta_{max}}=102$  m and the maximum  
183 salinity  $S_{max}$  of 35.11 **psu** at the depth  $Z_{S_{max}}=176$  m is found on the slope at about 1000 m  
184 isobath. It is obvious that the salinity maximum depth must be always larger than the  
185 temperature maximum depth to satisfy the condition of hydrostatic stability. Indeed, if  $Z_{\theta_{max}}=$   
186  $Z_{S_{max}}$  then  $\partial\sigma_\theta/\partial z = 0$  at  $z = Z_{\theta_{max}} = Z_{S_{max}}$  (hydrostatically neutral stratification), and if  $Z_{\theta_{max}}>$   
187  $Z_{S_{max}}$  then  $\sigma_\theta(Z_{\theta_{max}}) < \sigma_\theta(Z_{S_{max}})$  (hydrostatically unstable stratification).

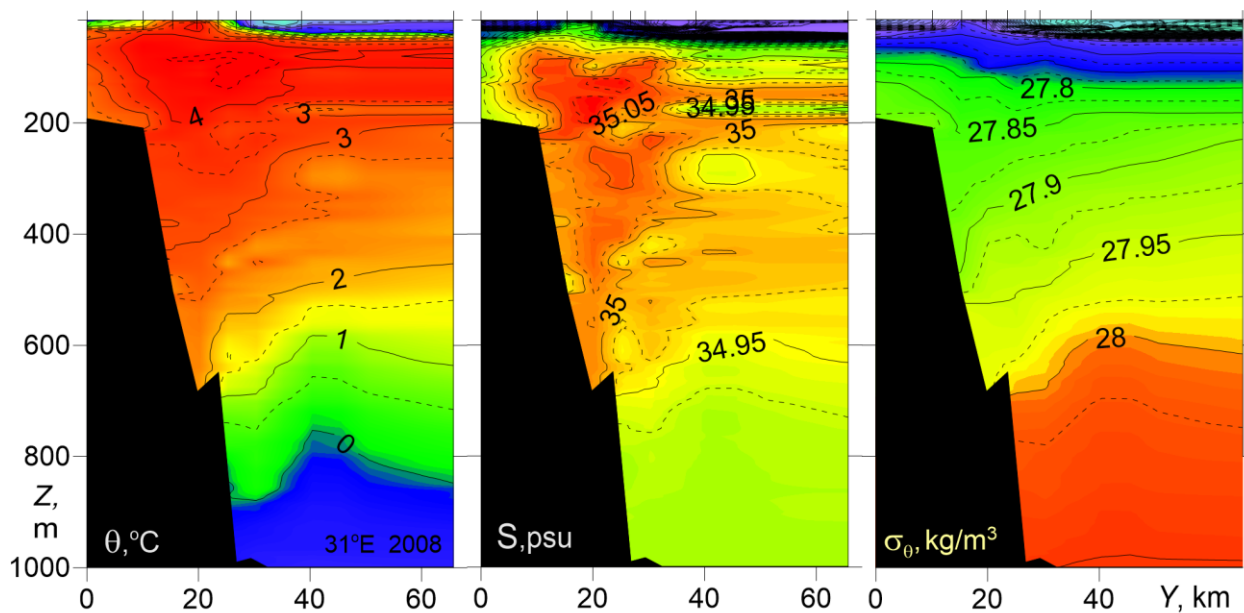

188

189 Fig. 2. Temperature  $\theta$ , salinity  $S$ , and potential density anomaly  $\sigma_\theta$  versus cross-slope distance  
 190 and depth for the NABOS-2008 transect across the Eurasian Basin slope at 31°E.

191 Figure 3 presents temperature, salinity, and potential density versus distance and depth  
 192 for two zonal transects across the St. Anna Trough at latitudes of 81 and 82°N. ~~These transects~~  
 193 ~~presented in Fig. 3 are characterized by a stable pool of cold ( $\theta < 0^\circ\text{C}$ ) and dense ( $\sigma_\theta > 28 \text{ kg/m}^3$ )~~  
 194 water in the bottom layer adjacent to the eastern slope of the Trough. The transfer of the densest  
 195 water pool to the eastern slope corresponds to a geostrophically balanced near-bottom gravity  
 196 flow to the North. Note, that the gravity bottom currents are a typical feature of ocean dynamics  
 197 and can develop in the narrows and troughs of various ocean basins (Arneborg et al., 2007;  
 198 Zhurbas et al., 2012), so it is natural that the water flowing through St. Anna Trough in the  
 199 Eurasian basin is transported **by a gravity current**. It is obvious that in case of near-bottom  
 200 gravity current the no motion depth level for geostrophic calculations is implied to be well above  
 201 the current. This near-bottom gravity current carries also waters of Atlantic origin, which are  
 202 strongly cooled due to mixing with shallow waters of the Arctic shelf seas (the Barents and Kara  
 203 seas). Above the near-bottom gravity flow of the BSBW one can observe two-core structure of  
 204 warm FSBW with temperature up to 2.5 °C that enters the St. Anna Trough from the north-west  
 205 at the western side of the Trough and leaves it for the north-east at the eastern side of the Trough.  
 206 At 82°N (top panels in Fig. 3), the BSBW overflows a sufficiently deep ridge (at approx. 500 m  
 207 depth) between the St. Anna Trough and the Voronin Trough. The latter is located in the  
 208 longitude range of 80–90°E east of the St. Anna Trough and west of the Severnaya Zemlya  
 209 islands (see Fig. 1). Therefore, one may suggest that a part of the BSBW enters the Eurasian  
 210 Basin at 90°E leaving the Voronin Trough. ~~See also (Schauer et al., 2002; Rudels et al., 2014).~~



211

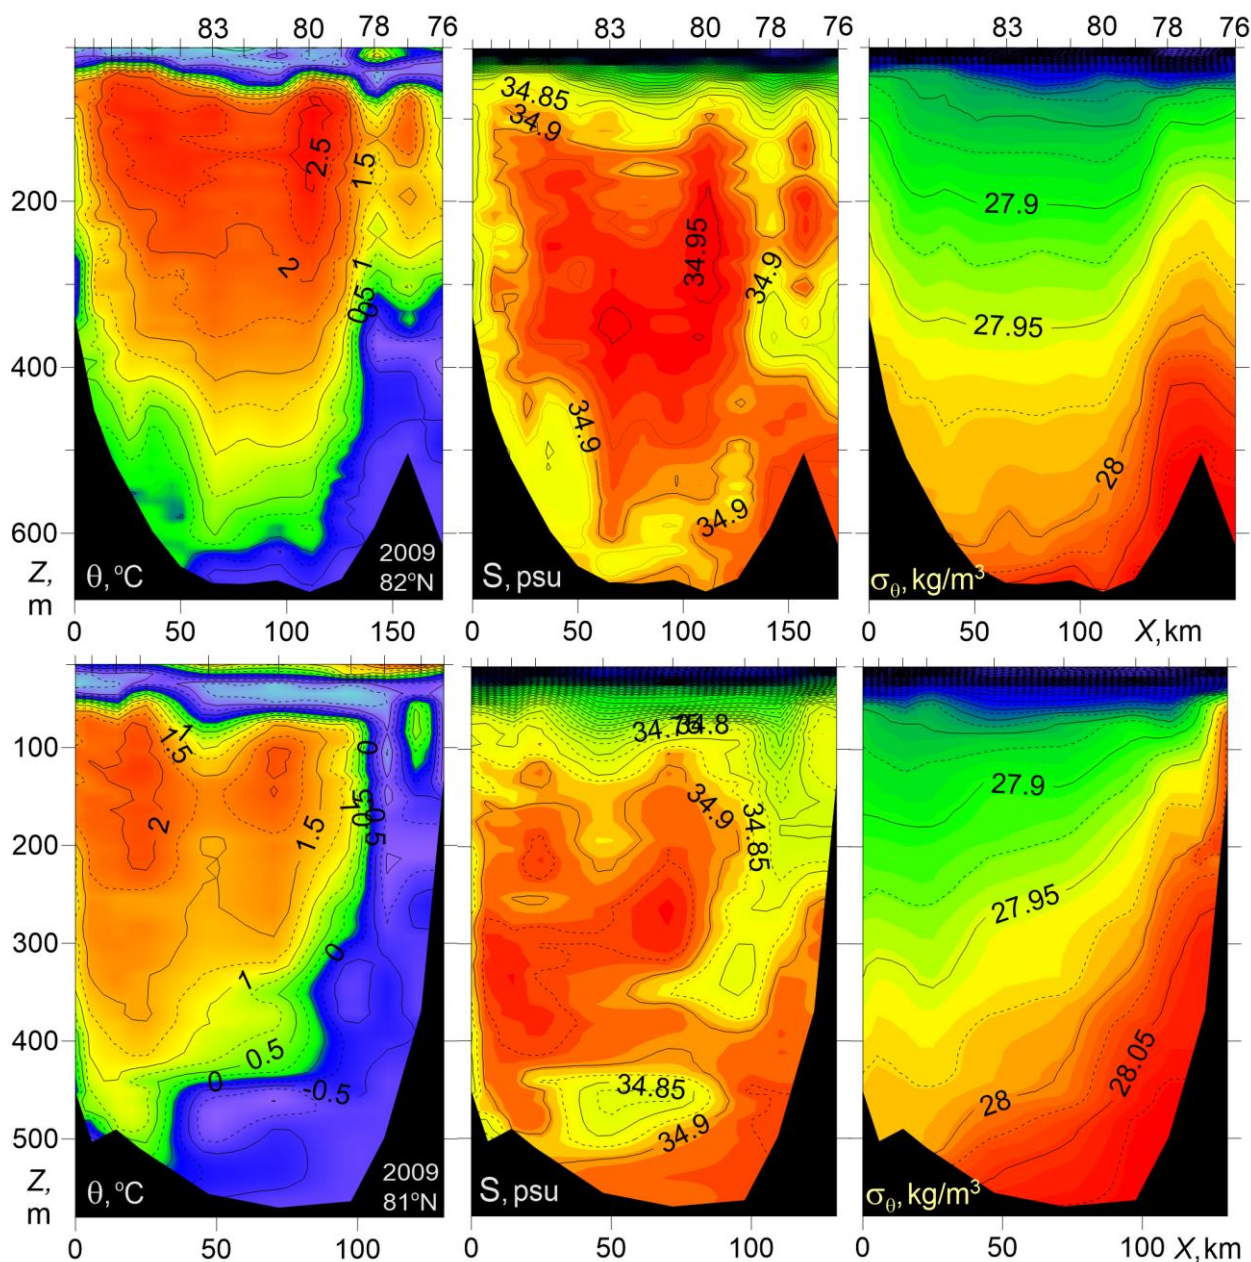212  
213

214 Fig. 3. Temperature  $\theta$ , salinity  $S$ , and potential density anomaly  $\sigma_\theta$  versus distance and depth for  
 215 zonal transects across the St. Anna Trough at latitudes of 81°N (bottom, NABOS-2009), and  
 216 82°N (top, NABOS-2009). The  $X$ -axis is directed to the east.

217 To understand the mechanisms of interaction and transformation of the FSBW and the  
 218 BSBW, it is necessary to identify water masses of different origin. For that purpose the following  
 219 criterion is often used (Walsh et al., 2007; Pfirman et al., 1994): the water masses of the FSBW  
 220 are characterized by  $\theta > 0$  °C, and the BSBW can be identified by the following expressions:  $-2$   
 221 °C  $< \theta < 0$  °C,  $34.75$  psu  $< S < 34.95$  psu and  $27.8$  kg/m<sup>3</sup>  $< \sigma_\theta < 28.0$  kg/m<sup>3</sup>. However, according to  
 222 Fig. 3, the potential density  $\sigma_\theta$  of the BSBW exceeds the upper limit of the last inequality,

223 reaching the value of  $28.05 \text{ kg/m}^3$  and the potential temperature  $\theta$  does not reach the value of  $-2$   
 224  $^{\circ}\text{C}$  and is less than  $-1 \text{ }^{\circ}\text{C}$  only in some cases. Thus, the BSBW thermohaline indices can be close  
 225 to the values of temperature and salinity in the so-called Upper Polar Deep Water layer (UPDW,  
 226 Rudels et al., 1994), the potential temperature of which lies within the range  $-0.5 \text{ }^{\circ}\text{C} < \theta < 0 \text{ }^{\circ}\text{C}$ ,  
 227 and the salinity is close to  $34.9 \text{ psu}$  (Walsh et al., 2007). Such a layer can be seen in Fig 2 in the  
 228 depth range below  $800 \text{ m}$ . The overlapping of the ranges of variability of temperature and  
 229 salinity for the UPDW and the BSBW makes it difficult to determine the origin of water masses  
 230 in the eastern part of the Nansen Basin. In some cases, however, analysis of  $\theta$ - $S$  diagrams can  
 231 provide useful information for identification of different water masses (see Subsection 3.1b).

232 In Fig. 4 the CTD transect at  $92^{\circ}\text{E}$  carried out in the *Polarstern*-1996 expedition just east of the  
 233 entrance point of the BSBW to the Eurasian Basin from the St. Anna Trough and Voronin  
 234 Trough is presented. It can be assumed that a part of the BSBW extends deep into the Basin,  
 235 mixing with the FSBW, while another part of the BSBW moves eastward along the slope as a  
 236 deep gravity current according to the general cyclonic circulation observed in the Eurasian  
 237 Basin. On the presented transect the BSBW is observed in the depth range below  $600 \text{ m}$  as a  
 238 narrow, about  $10 \text{ km}$  wide stripe of cold water near the slope (see also Subsection 3.1b) adjacent  
 239 to a  $300 \text{ km}$  wide zone occupied by the warm FSBW. The pattern of the potential density of  
 240 FSBW on this transect is similar to transects at  $31^{\circ}\text{E}$ . Namely, despite of the masking effect of  
 241 vertical undulations of  $\sigma_{\theta}$  contours caused by internal waves and mesoscale eddies (one of  
 242 subsurface, intra-pycnocline eddies is probably identified at the distance of  $Y=510 \text{ km}$ ), one  
 243 cannot miss the tendency of shallowing/sloping down the  $\sigma_{\theta}$  contours above/below the FSBW  
 244 core towards the continental slope margin (to the south) which, in terms of geostrophic balance  
 245 implies the eastward flow of FSBW. The FSBW core on the  $92^{\circ}\text{E}$  transect is found at  $40 \text{ km}$   
 246 distance from the slope, with the maximum temperature  $\theta_{max}=2.79^{\circ}\text{C}$  at  $Z_{\theta_{max}}=271 \text{ m}$  and  
 247 salinity  $S_{max}=34.97 \text{ psu}$  at  $Z_{S_{max}}=329 \text{ m}$ . Therefore, the FSBW on its pathway along the slope of  
 248 the Eurasian Basin from  $31^{\circ}\text{E}$  to  $92^{\circ}\text{E}$  has cooled, desalinated, sank and become denser by  
 249 approx.  $2 \text{ }^{\circ}\text{C}$ ,  $0.1 \text{ psu}$ ,  $150 \text{ m}$ , and  $0.1 \text{ kg/m}^3$ , respectively. Another significant feature seen in the  
 250 PS96 transect is an increased temperature pool in the layer of  $180\text{--}300 \text{ m}$  at the distance of  
 251  $Y=600\text{--}750 \text{ km}$  in the vicinity of the Lomonosov Ridge which can be attributed to the FSBW  
 252 return flow cyclonically circulating around the Eurasian Basin. Note that the existence of return  
 253 flow next to the Lomonosov Ridge is confirmed in terms of geostrophic balance by sloping down  
 254 density contours towards  $Y$ -axis.

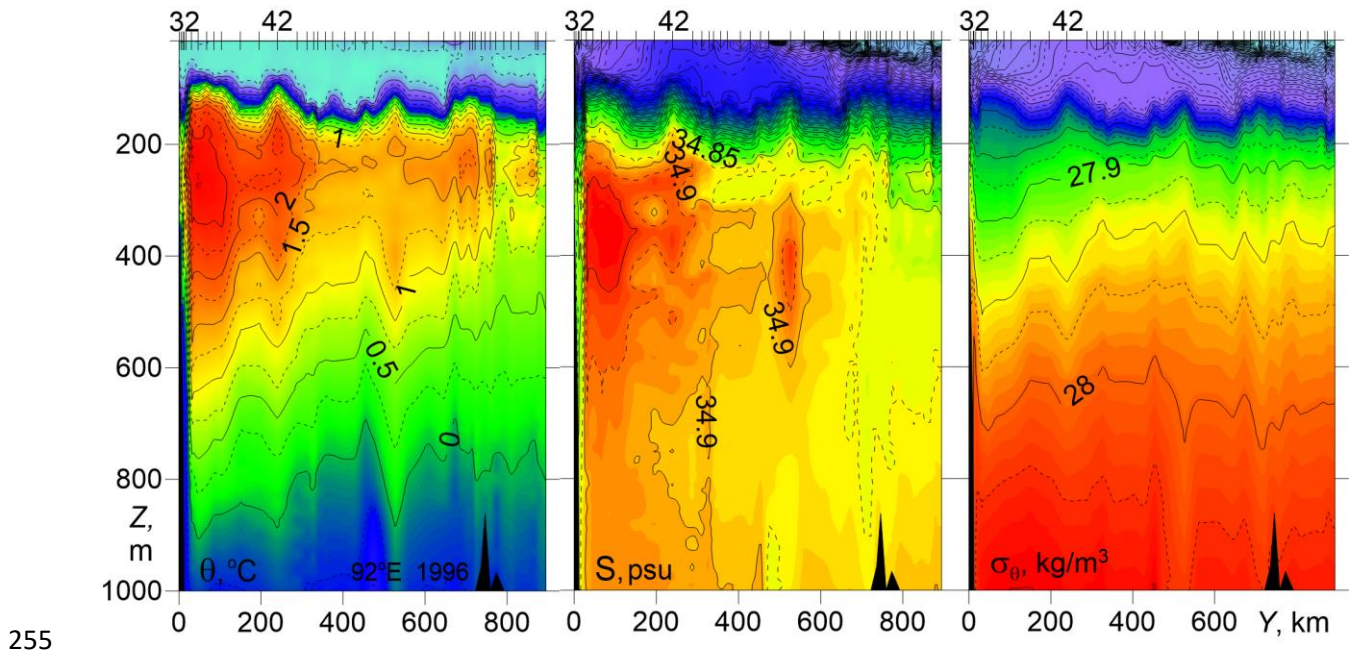

256 Fig. 4. Temperature  $\theta$ , salinity  $S$ , and potential density anomaly  $\sigma_\theta$  versus distance and depth for  
 257 cross-shelf transects at 92°E (PS-1996).

258

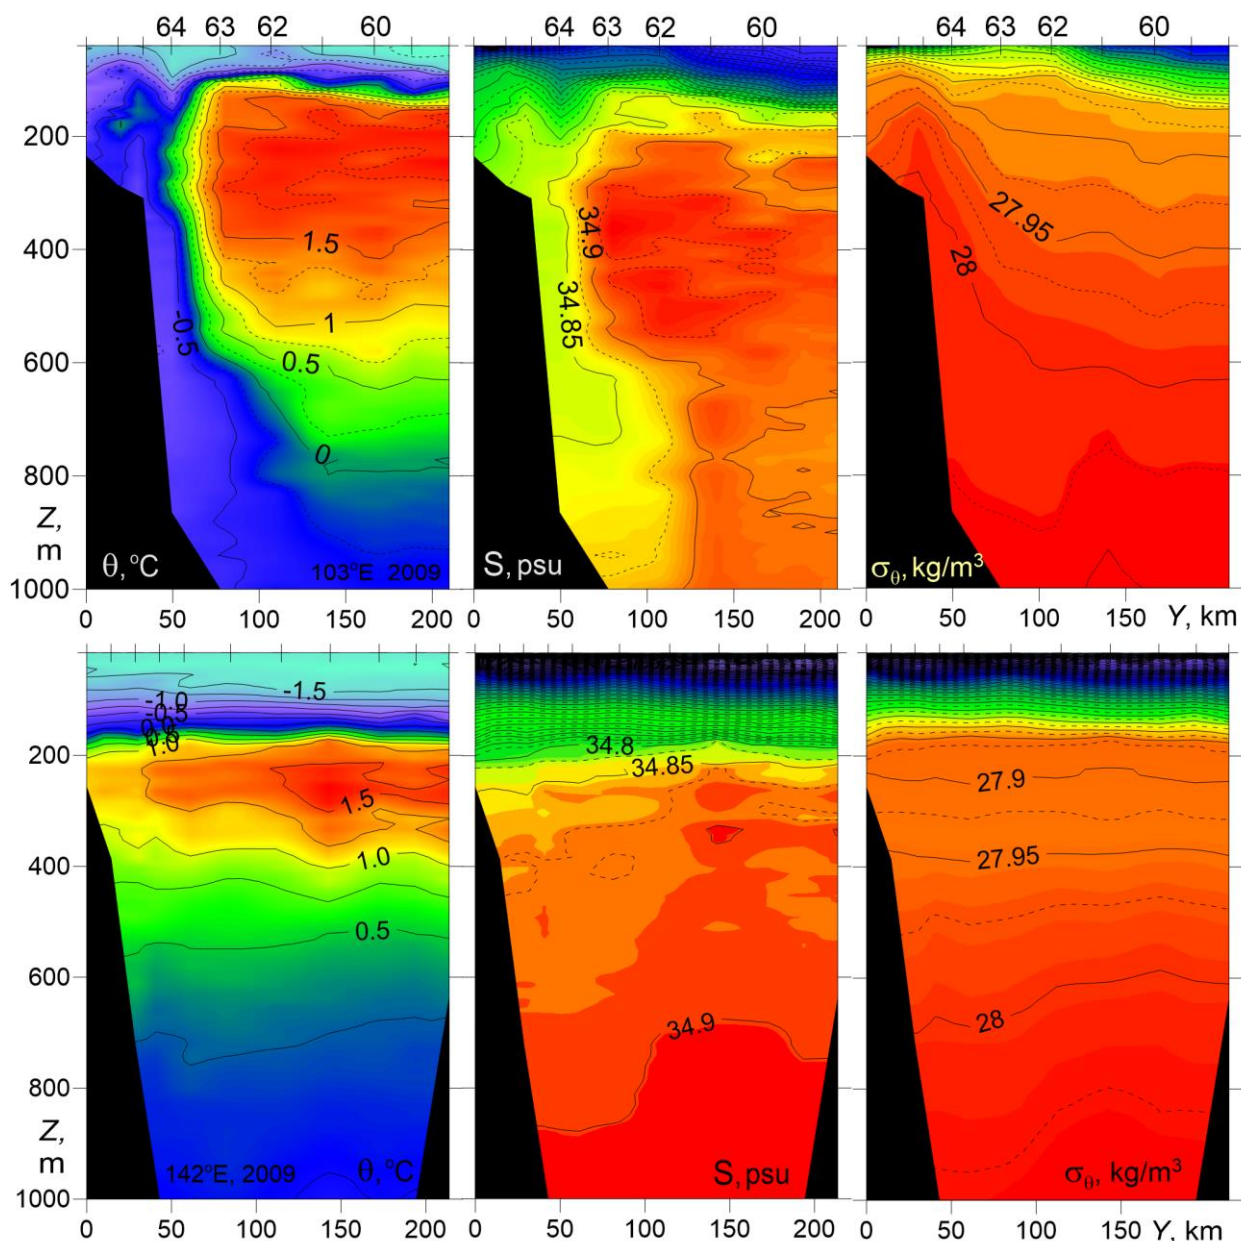

259

260 Fig. 5. Temperature  $\theta$ , salinity  $S$ , and potential density anomaly  $\sigma_\theta$  versus distance and depth for  
 261 cross-shelf transects at 103°E (upper) and 142°E (lower) (NABOS-09).

262 Further east, in the longitude range of 94–107 °E (NABOS-09), the BSBW being denser dives  
 263 under the FSBW, and the pattern of potential density on cross-slope transects is characterized by  
 264 sloping down density contours towards the North in a 150 km wide zone adjacent to the slope  
 265 (see Fig. 5, top panel) which is typical for the near-bottom gravity currents and corresponds to  
 266 the eastward geostrophic flow provided that the no motion depth level remains within the above-  
 267 lying layers. One reason to associate the BSBW with gravity current is the potential temperature  
 268 values below -0.5 °C (see Subsection 3.1b). The vertical location of the FSBW layer has not  
 269 changed much relative to the 92°E in the section PS-96 but the maximum temperature has further  
 270 decreased: in the transect in Fig. 5, the top panel,  $\theta_{max}=1.98$  °C at  $Z_{\theta_{max}}=245$  m and  $S_{max}=34.95$

271 psu at  $Z_{Smax}=365$  m. The bottom panel of Fig. 5 presents the data from transect at 142°E  
 272 (NABOS-09) which is located on the Lomonosov Ridge, the frontier between the Amundsen and  
 273 Makarov Basins. The comparison of the two transects obtained in the same year shows that the  
 274 vertical scale of the especially warm FSBW water ( $\theta > 1.5$  °C) has significantly decreased.  
 275 Nevertheless, it is obvious that the FSBW waters are also observed at these latitudes and affect  
 276 the slopes of isopycnic surfaces in a layer up to 300 m. The cold waters with  $\theta < 0$  °C, which can  
 277 be associated with the BSBW, are observed only at two stations in the depth range close to 1000  
 278 m, and are practically absent at the depths above 950 m. The slopes of isopycnic surfaces in the  
 279 bottom panel of Fig. 5 are small, which is typical for weak geostrophic volume flow rate (see  
 280 Section 3.2). It is worth noting that due to the low variability of the temperature and salinity  
 281 fields, the water with ~~absolutely~~ stable thermohaline stratification is well visualized (Fig. 5,  
 282 bottom panel): the temperature decreases and salinity increases with depth. This structural  
 283 feature of the mean thermohaline stratification is also common to the UPDW (Rudels et al.,  
 284 1999; Kuzmina et al., 2011, 2014).

285 In Fig. 6 three transects are presented, two of which were made at 126°E and 142°E  
 286 (NABOS-2005) and the third one was made in the Makarov Basin at 159° E (NABOS-2007). On  
 287 the transect along 126°E large slopes of isopycnic surfaces are observed, which corresponds to a  
 288 fairly intensive geostrophic flow (see Section 3.2), confined to the depth range of 200–400 m,  
 289 that is, to the area occupied by the FSBW. At the 142°E transect which is located on the  
 290 Lomonosov Ridge, the frontier between the Amundsen and Makarov basins, and at the 159°E  
 291 transect in the Makarov Basin, the FSBW **can be still identified as a warm layer** within a depth  
 292 range of 200–400 m, where the maximum temperature has lowered to 1.49 °C and 1.42 °C,  
 293 respectively (Fig. 6). One can observe **some sloping down** of potential density contours towards  
 294 the continental slope on the 142°E transect implying some eastward geostrophic transport. As to  
 295 the 159° E transect, the potential density contours **look quite flat, so one cannot visually identify**  
 296 **any significant baroclinic flow**. In the area of cold waters (the depth range below 800 m) high  
 297 slopes of isopycnic surfaces are not observed on any sections shown in Fig. 6, which may  
 298 indicate the weakness or absence of the baroclinic flow.

299

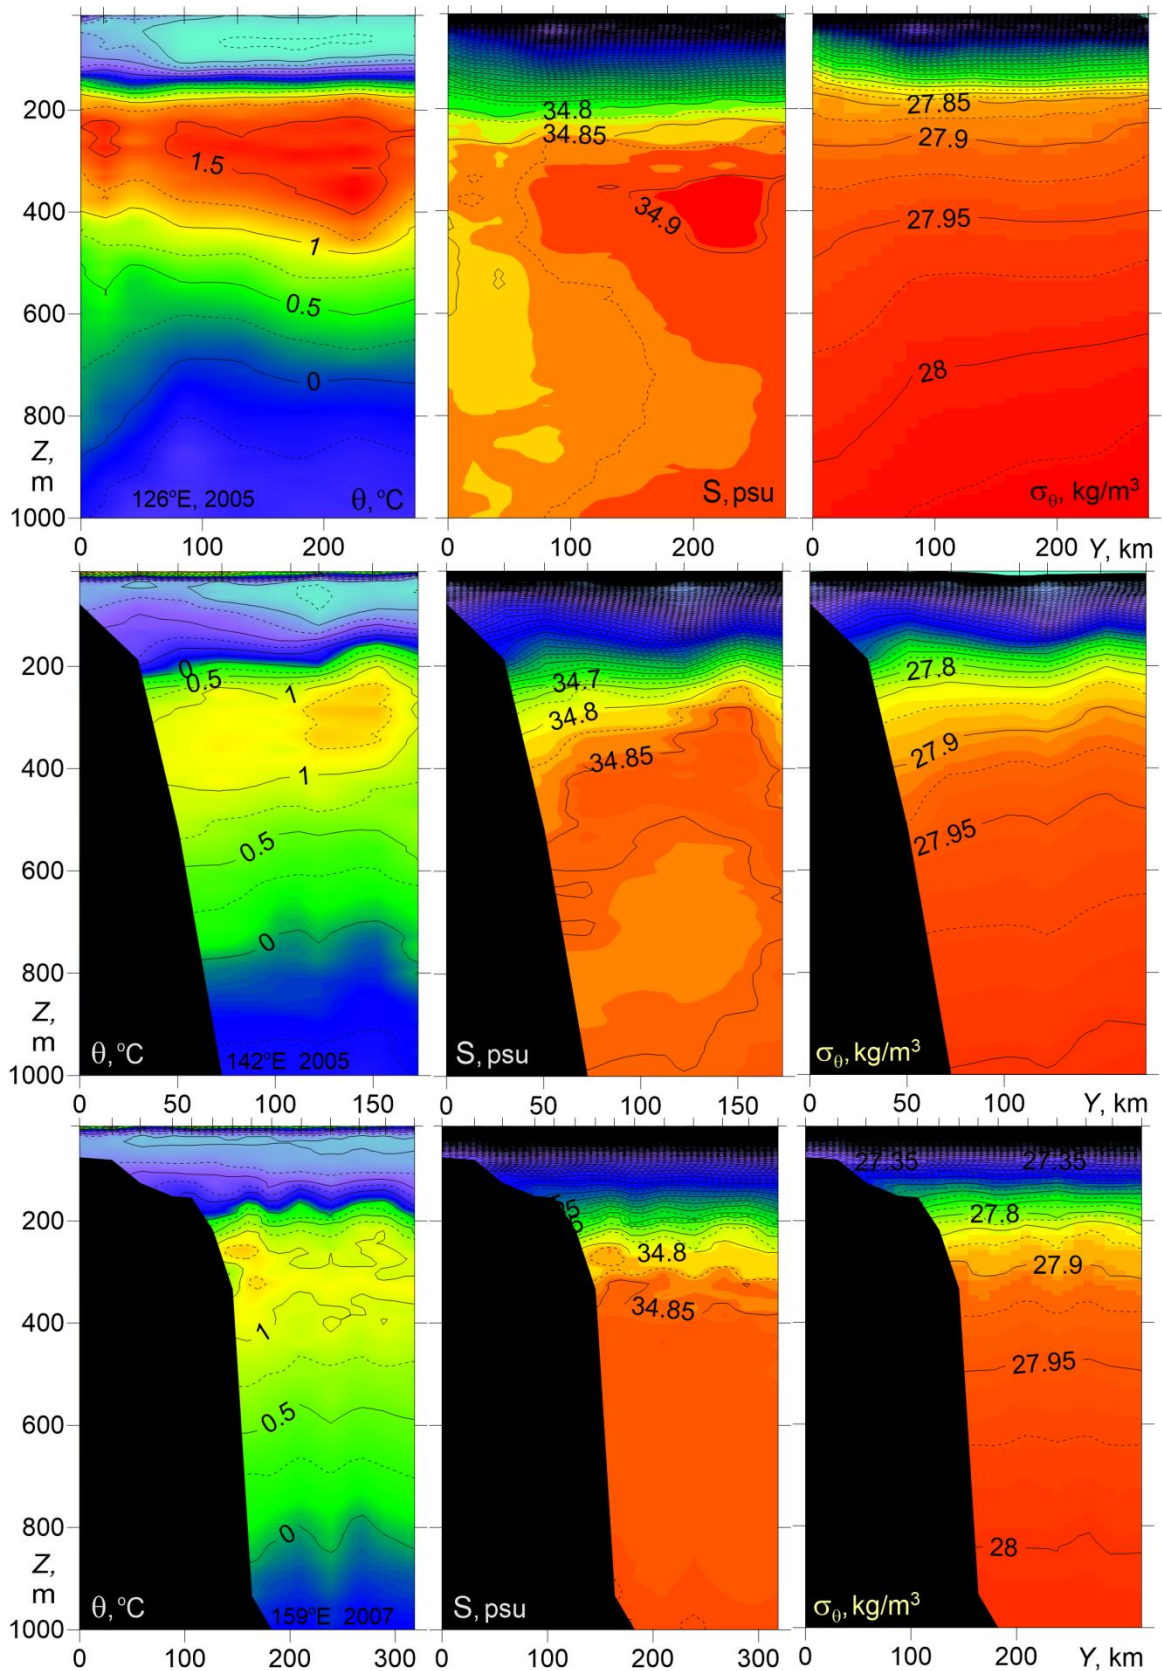

300

301 Fig. 6. Temperature  $\theta$ , salinity  $S$ , and potential density anomaly  $\sigma_\theta$  versus distance and depth for  
 302 cross-shelf transects at 126°E, 142°E (top and middle, NABOS-2005) and  
 303 159°E (bottom, NABOS-2007).

304 Concluding this section, we would like to state the following theses. The combined FSBW-  
305 BSBW structure with isopycnals sloping down to the north (from the slope), is typical for the  
306 longitude range 94–107°E. On the transects made along 126°E, 142°E, and 159°E, the slopes of  
307 isopycnic surfaces indicating the baroclinic flow, were observed generally in the depth range of  
308 200–400 m, that is in the area occupied by the FSBW. As the FSBW moved along the  
309 continental slope of the Eurasian Basin, a significant decrease of temperature was observed in  
310 the FSBW core. However, despite this the FSBW was satisfactorily identified at all transects,  
311 including the two transects in the Makarov Basin (159°E). The cold waters on the transects along  
312 126°E, 142°E and 159°E, which can be associated with the BSBW, had a minimum temperature  
313 above -0.5 °C, were observed in the depth range below 800 m and had a little effect on the  
314 spatial structure of isopycnic surfaces.

315 *b.  $\theta$ -S analysis*

316 To study the transformation of various water masses in the Arctic Basin the  $\theta$ -S analysis  
317 have been applied in a number of papers (see, e.g., Schauer et al., 1997; Rudels et al., 1999;  
318 Schauer et al., 2002; Rudels et al., 2004; Walsh et al., 2007; Dmitrenko et al., 2015). We will  
319 also apply this method to study the transformation of BSBW along the slope.

320 ~~As mentioned above,~~ the difficulty in identifying the BSBW in the eastern part of the  
321 Nansen Basin is related to the overlapping ranges of temperature and salinity inherent to the  
322 BSBW and the upper layer of the Polar Deep Water (UPDW). It is also important to note that the  
323 BSBW in the St. Anna Trough mixes with the FSBW. Therefore, not only the cold Atlantic  
324 Waters, which are transported by the bottom gravity current, but also mixed warmer waters can  
325 enter the Nansen Basin through the Trough (see Fig. 3). That is, one can observe some  
326 resemblance in the potential temperature and salinity distributions across the St. Anna Trough  
327 (Fig. 3) and that of the cross-slope section PS-96 at 92°E (Fig. 4), despite of the fact that the  
328 CTD measurements were performed in different years. Therefore, it is expected that only a  
329 detailed analysis of the  $\theta$ -S indices on different CTD sections, obtained at approximately the  
330 same time (e.g., the same year), can provide useful information on the movement and  
331 transformation of BSBW.

332 Fig. 7 presents  $\theta$ -S diagrams based on the CTD profiling in (a) the St. Anna and Voronin  
333 Troughs (NABOS-09, 82°N), (b) the PS-96 section at 92°E, and the NABOS-09 sections at  
334 103°E (c) and 142°E (d). For convenience of presentation, the points of the  $\theta$ -S curves with  
335 salinity below 30 psu were omitted.

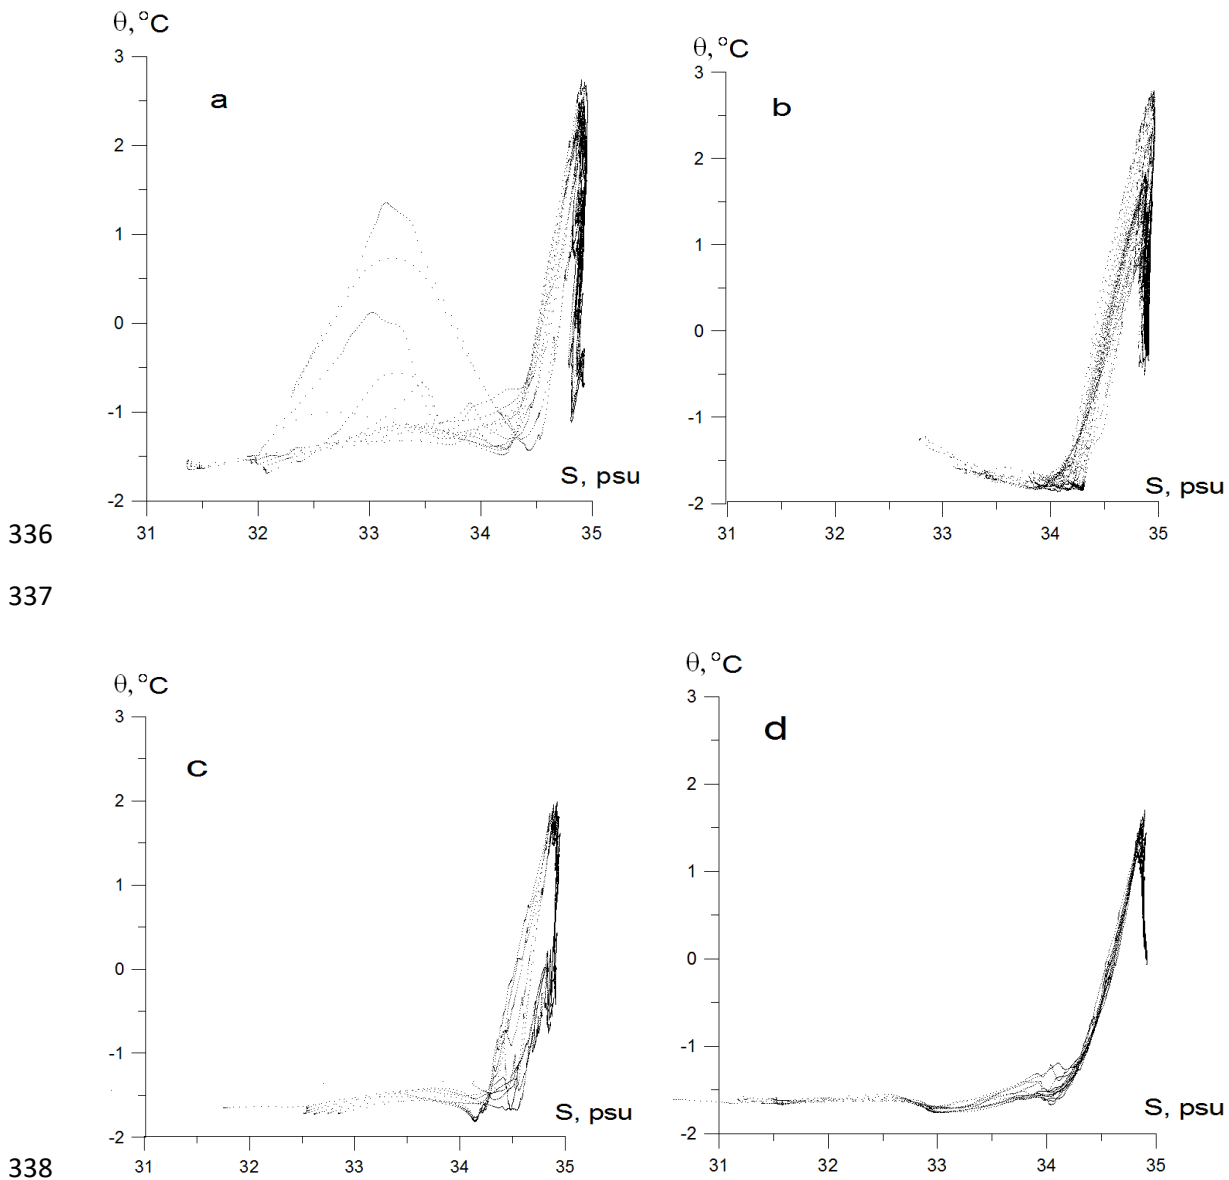

339 Fig. 7.  $\theta$ - $S$  diagrams based on the CTD profiling in (a) the St. Anna and Voronin troughs  
 340 (NABOS-09, 82° N), (b) the PS-96 section at 92°E, and the NABOS-09 sections at 103°E (c)  
 341 and 142°E (d).

342

343 ~~The diagrams presented in Fig. 7 have significant similarities and differences.~~  The  
 344 differences in the behavior of the  $\theta$ - $S$  indices are observed in the upper and deep layers of the  
 345 Eurasian Basin and the St. Anna Trough. On the other hand, one cannot miss a similarity in the  
 346 shape of the  $\theta$ - $S$  curves in the salinity range of 34.5–35.0 psu. The similarity is obviously caused  
 347 by the presence of FSBW. The plots in Fig. 7 demonstrate the transformation of the FSBW and  
 348 BSBW moving along the continental slope of the Eurasian Basin. More detailed information on  
 349 the BSBW transformation can be extracted from  $\theta$ - $S$  diagrams presented in Fig. 8.



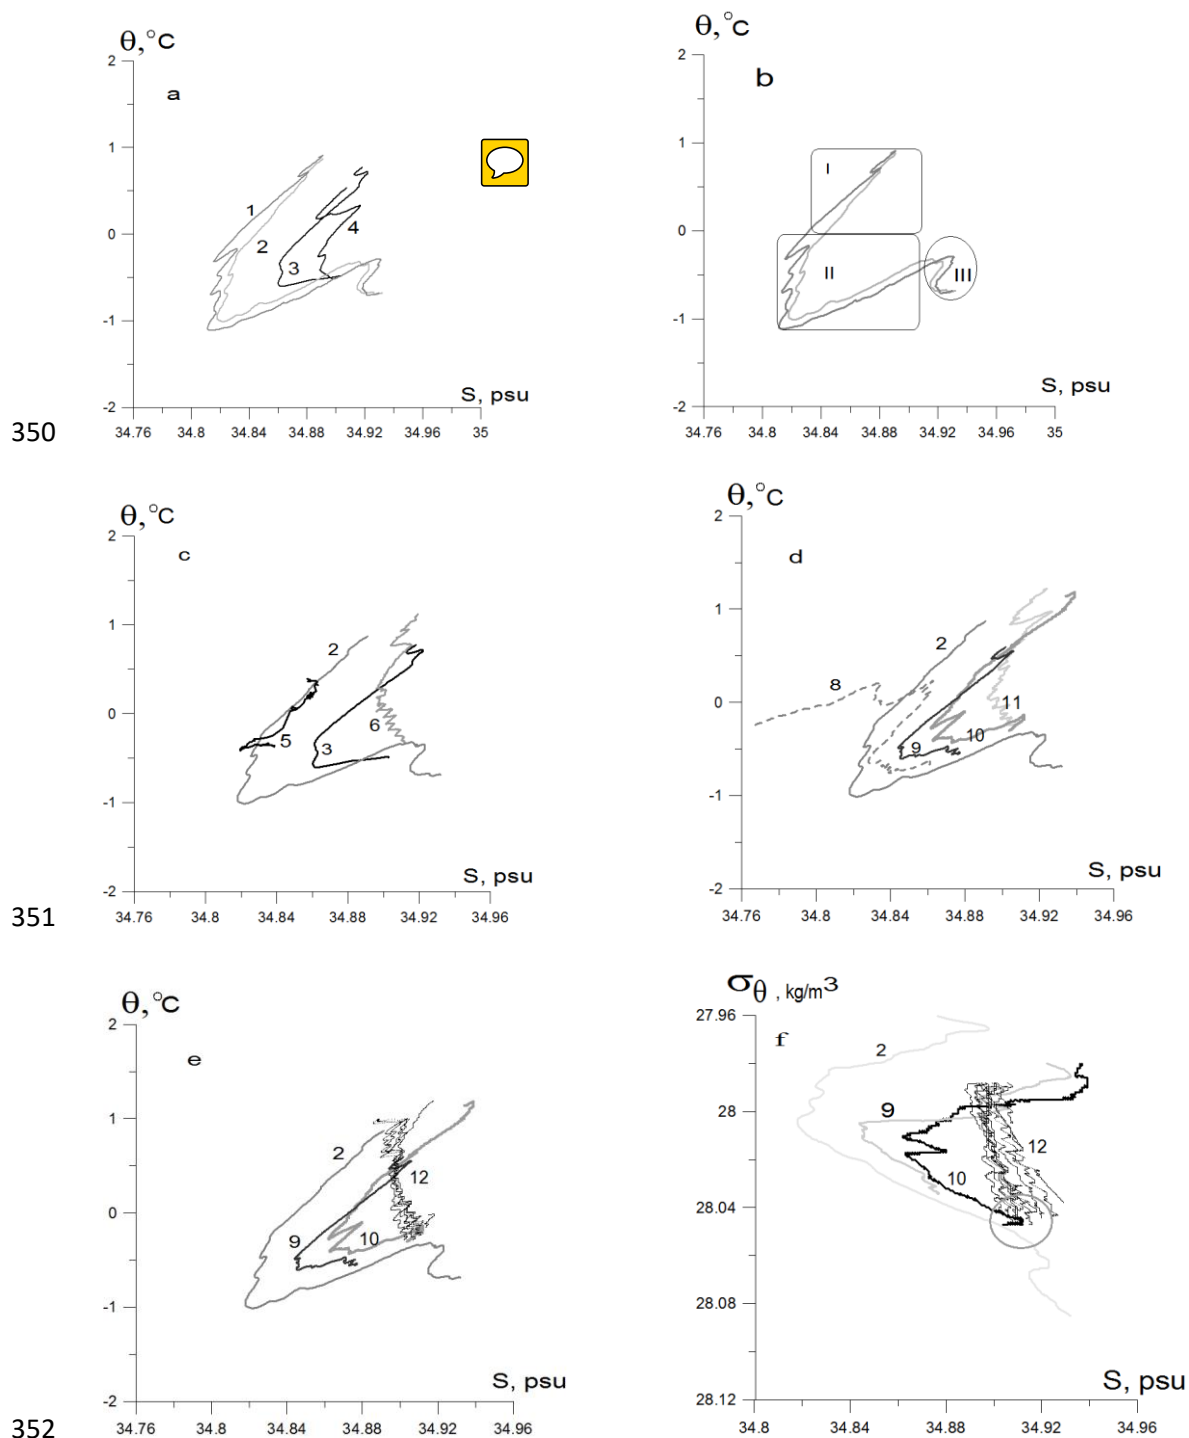

353 Fig.8. Thermohaline indexes of the BSBW and FSBW: a) based upon the CTD profiles, obtained  
 354 in the St. Anna Trough (NABOS-09, section 82°N), curves 1–4 correspond to the stations (st.)  
 355 76, 78, 83 and 80, respectively; b) the same as “a” but only curves 1 and 2 are presented; regions  
 356 I, II, III illustrate three different water masses in accordance with (Dmitrenko et al., 2015); for  
 357 explanations see the text; c) based upon the section of PS-96, curves 5 and 6 corresponding to st.  
 358 32 and 42, respectively (depth range 600–1000 m), curves 2 and 3 are shown for the reference;  
 359 d) for CTD profiles at the 103°E section, NABOS-09, curve 8 (st. 64), curve 9 (st. 63), curve 10  
 360 (st. 62), curve 11 (st. 60), and curve 2 for the reference (see Fig. 5 for the location of the  
 361 stations); e) based upon the CTD profiles in the depth range 500–1200 m measured at the 126°E  
 362 (section of NABOS-09), curves 12; curves 2, 9 and 10 are shown for the reference; f) the same  
 363 as “e” but presented in coordinates  $\sigma_{\theta}$ ,  $S$ .

364 The  $\theta$ - $S$  diagrams related to the St. Anna Trough (NABOS-09, section 82°N) are presented  
 365 in Fig. 8a. The curves marked as 1 and 2 correspond to stations 76 and 78, respectively, which  
 366 were located at the eastern slope of the Trough just in the near-bottom gravity current carrying  
 367 the BSBW, while the curves marked as 3 and 4 correspond to stations 83 and 80 located near the  
 368 mid-point (thalweg) of the Trough in the western periphery of the gravity current (the location of  
 369 the stations is shown in Fig. 3). To visualize better the BSBW transformation, the points of  $\theta$ - $S$   
 370 curves in the temperature and salinity ranges of  $\theta > 1.2$  °C and  $S < 34.76$  psu, respectively, were  
 371 omitted. The same kind of similarity of the  $\theta$ - $S$  curves in the St. Anna Trough was observed  
 372 within NABOS Program in other years (NABOS-13, NABOS-15).

373 The curves 1 and 2 in Fig. 8a have similar knee-like shape (Dmitrenko et al., 2015) formed  
 374 by (i) the upper warm and saline water layer of the FSBW ( $\theta \gg 0$  °C), (ii) the intermediate  
 375 colder and fresher water layer of BSBW ( $\theta < 0$  °C) underlying the FSBW, and (iii) the denser  
 376 more warmer and saltier “true” mode of the BSBW ( $\theta \approx 0$  °C). ~~To understand better the~~  
 377 ~~differences between these water masses~~ see Fig. 8b: FSBW (region I), BSBW (region II), “true”  
 378 mode BSBW (region III). The difference between the BSBW and “true” BSBW is in that the  
 379 former is more diluted with the colder and fresher Barents Sea water (see paper by Dmitrenko et  
 380 al. (2015) for more details). We will be interested in the transformation of the main part of the  
 381 knee, namely the transformation of the moving along the slope BSBW.

382 In Fig. 8c the comparison of typical  $\theta$ - $S$  curves related to the St. Anna trough (they are also  
 383 shown in the other panels of Fig. 8 for reference) with that of the 92°E section of PS-96 is given:  
 384 the curves 5 and 6 correspond to st. 32 and st. 42 (depth range 600–1000 m) of the PS-96  
 385 section, respectively. St. 32 was located next to the slope, while st. 42 was located about 250 km  
 386 apart from the slope. The coincidence of curve 5 with a part of curve 2 evidences for the BSBW  
 387 moving along the slope in the form of a near-bottom gravity flow (see Fig. 4 and its legend 1).  
 388 Curve 6 corresponds to the UPDW. The  $\theta$ - $S$  diagrams for CTD profiles at the section 103°E,  
 389 NABOS-09, are given in Fig. 8d: curve 8 (st. 64), curve 9 (st. 63), curve 10 (st. 62), curve 11 (st.  
 390 60), and the reference curve 2 (see Fig. 5 for the location of stations). Curves 8, 9, and 10 are  
 391 similar to curve 2, and indicate the BSBW being an along-slope gravity flow. Curve 11, being  
 392 similar to curve 6 in Fig. 8c, corresponds to the  $\theta$ - $S$  indices of the UPDW. However, the BSBW  
 393 is not observed in the section 126°E: see Fig. 8e, where a bunch of  $\theta$ - $S$  curves (curves 12)  
 394 presents all CTD profiles in the depth range 500–1200 m measured at the section 126°E of  
 395 NABOS-09. Also we do not observe the BSBW further to the east on the section 142°E of  
 396 NABOS-09 (not shown) as well as in the Makarov Basin.

397 To estimate the potential density of deep waters at the sections 103°E and 126°E  $\sigma_{\theta}$ - $S$   
 398 diagrams are shown in Fig. 8f: curves 2, 9 and 10 correspond to  $\theta$ - $S$  curves 2, 9 and 10 presented

399 in Fig. 8d, curves 12 correspond to curves 12 in Fig. 8e. As one can see, the BSBW is  
 400 characterized by knee-shape diagram also in coordinates  $\sigma_\theta, S$ . However the knee-shape diagram  
 401 is not observed along 126°E in these coordinates. The dense and cold deep waters in the section  
 402 126°E have  $\sigma_\theta, \theta, S$  indices typical for the “true” BSBW mode (~~see paper by~~ Dmitrenko et al.  
 403 (2015)). Nevertheless, it is hardly correct to consider these waters (see  $\sigma_\theta, S$  indices inside the  
 404 circle; Fig. 8f) as the true BSBW mode, since  $\sigma_\theta, \theta, S$  indices of these waters satisfactorily  
 405 correspond to  $\sigma_\theta, \theta, S$  indices of the UPDW in the western part of the Nansen Basin (at  
 406 longitudes to the west of 90°E). To evaluate the transformation of the “true” mode of the moving  
 407 along the slope BSBW an additional analysis is required, which is beyond the scope of this  
 408 paper.

409 Thus, the results presented in Fig. 8 show that the BSBW, which is characterized by the  
 410 knee-shape diagram in coordinates  $\theta, S$  and  $\sigma_\theta, S$ , does not reach 126°E. This confirms the  
 411 conclusions formulated in Subsection 3.1a. Moreover, given the characteristic feature of the  $\theta$ - $S$   
 412 structure of BSBW in the St. Anna and Voronin Troughs (curves 1–4 in Fig. 8a) ~~was~~ observed in  
 413 other years, we carried out similar analysis using all available CTD data, which also confirmed  
 414 the above conclusion. Thus, a reasonable assumption, which could be made about the movement  
 415 of BSBW over long distances in the form of an along-slope gravity flow, is not confirmed by the  
 416 analysis of a large volume of empirical data.

417 According to (Schauer et al., 1997), the FSBW and BSBW merge and mix around 126°E  
 418 and then spread along the slope as a single flow. Thus, the question of transformation of the  
 419 BSBW will remain open. The absence of such waters at 126°E and further to the east along the  
 420 slope can be considered a kind of phenomenon. Indeed, let us compare Fig. 8d with Fig. 9, where  
 421 the corresponding vertical temperature profiles are presented (see the numbering of the  $\theta$ - $S$   
 422 curves and profiles).

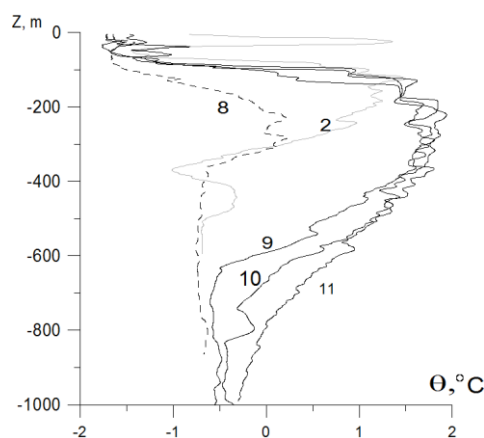

423

424

425 Fig.9. Vertical temperature profiles from CTD-stations along 103°E (NABOS-09): curve 8  
 426 (st.64), curve 9 (st. 63), curve 10 (st. 62), curve 11 (st. 60) (see the numbering of the  $\theta$ - $S$  curves  
 427 in Fig. 8d) and CTD-station across St. Anna Trough (NABOS-09, section 82°N), curve 2 (st.82).

428 The  $\theta$ - $S$  curves 2 and 10 in Fig. 8 correspond to vertical temperature profiles 2 and 10 in  
 429 Fig. 9 for the depth ranges of 300–600 m and 600–1000 m, respectively. The transformation of  
 430 the profiles evidences for an effect of stretching of the water column coming from the St. Anna  
 431 Trough to the Nansen Basin. This effect is described in detail in (Schauer et al., 1997).

432 Obviously, the movement of the BSBW along the slope does not occur adiabatically, so the  
 433 prominent knee-like feature (curve 2 in Fig.8a) corresponds to anomaly on profile 2 of Fig. 9  
 434 (below 300 m) should noticeably smooth out in the moving water mass. Nevertheless, it is  
 435 possible to estimate the cross section area  $\Delta S$  through which the BSBW passes in the section  
 436 along 103°E. Taking into account the distance between stations at which profiles 9–11 were  
 437 measured, we get  $\Delta S \approx 2 \cdot 10^7 \text{ m}^2$ . Such a cross section area is not small: at an average cross-  
 438 sectional flow velocity of 1 cm/s, the volume flow rate through a cross section of this magnitude  
 439 can reach about 0.2 Sv.

440 **The absence of the main part** of BSBW (with temperature less than - 0.5°C) at longitudes  
 441 to the east of 126°E may be due to various reasons, including mixing with the FSBW caused by  
 442 thermohaline intrusive layering at **stable-stable** stratification (Merryfield, 2002; Kuzmina et al.,  
 443 2013; Kuzmina et al., 2014; Kuzmina, 2016, Zhurbas N., 2018; Kuzmina et al., 2018, 2019).  
 444 Indeed, according to numerous studies, the intrusive layering in the ocean determines the  
 445 processes of exchange and mixing of various water masses (see, e.g., Stern, 1967; Fedorov,  
 446 1976; Joyce, 1980; Zhurbas et al., 1993; Rudels et al., 1999; Kuzmina, 2000; Walsh and  
 447 Carmack, 2003). Other reasons for the missing main part of BSBW may be the following: the  
 448 influence of the slope topography, the impact of local counterflows near the slope (a description  
 449 of the counterflows is presented in (Pnyushkov et al., 2015)), lateral convection (a discussion of  
 450 the possibility of lateral convection occurrence in the near-slope zone can be found in e.g.  
 451 (Walsh et al., 2007), the observation and modelling of lateral convection are presented in (Ivanov  
 452 and Shapiro, 2005; Ivanov and Golovin, 2007)) and the impact of the Arctic Shelf Break Water  
 453 (circulation of the Arctic Shelf Break Water is investigated based on a numerical modeling  
 454 (Aksenov et al., 2011); the discussion on the influence of this branch on the process of mixing  
 455 waters near the slope is presented in (Ivanov and Aksenov, 2013)).

456 To clarify the reasons for the missing BSBW additional field measurements are required,  
 457 namely, CTD-transects across the slope between 103°E and 126°E.

458

459 *3.2. Characteristics of the Atlantic Water flow and geostrophic estimates of the volume flow rate*

460 ~~Applying an approach described above in Section 2 the geostrophic estimates of the AW volume~~  
461 ~~flow rate  $V$  were calculated for all CTD transects available. These estimates of  $V$ , as well as~~  
462 estimates of the hydrological parameters describing the AW flow in the Eurasian and Makarov  
463 Basins, are presented in Table 1. The geostrophic estimates of the near-bottom gravity volume  
464 flow rate of the BSBW in zonal transects across the St. Anna Trough are presented in Table 2.  
465 The only exception is the transect across the St. Anna Trough at 82°N where the near-bottom  
466 gravity current is seen to have a considerable eastward constituent due to overflow across a  
467 sufficiently deep ridge (approx. 500 m deep) between the St. Anna Trough and the Voronin  
468 Trough. The presence of the eastward constituent of indefinite value makes questionable the  
469 results of geostrophic calculations only accounting for the northward constituent of the flow.  
470 Note also that prior to the BSBW entering the area of the Eurasian Basin, our estimates refer to  
471 the FSBW; to east of this region our estimates should be attributed to the joint contribution of  
472 two branches – the FSBW and BSBW – to the transfer of the AW.

473 The hydrological parameters shown in Table 1 can be interpreted as follows. The  
474 maximum water temperature of the AW may exceed 5 °C in cases when the AW inflow to the  
475 Eurasian Basin consists of especially warm water masses. A typical change in the maximum  
476 temperature of the moving along the continental slope AW over a distance of about 1000 km is  
477 approximately 1–2 °C. A typical change of the maximum salinity of the moving along the slope  
478 AW over the same distance does not exceed 0.1 psu. Such values of the maximum temperature  
479 of the AW lead to a slight increase in potential density and therefore a deviation of the AW from  
480 the isopycnic distribution should be expected. This effect is most likely associated with the  
481 exchange of heat, salt, and mass with the surrounding waters due to the formation of intrusive  
482 layering and the influence of double diffusion (on the observation and study of intrusions in the  
483 Arctic Basin see, e.g., Rudels et al., 1999; Kuzmina et al., 2011; Polyakov et al., 2012; Kuzmina  
484 et al., 2013). The intrusions and double diffusion that occur at the boundaries of intrusions can  
485 also contribute to the reduction of the AW heat and salt content and the volume flow rate. The  
486 differences in the AW heat and salt content and the volume flow rate can be clearly seen from  
487 the PS-96 section when comparing data from stations near the continental slope of the Eurasian  
488 Basin at 92°E and from the vicinity of the Lomonosov Ridge at 140°E. It is worth noting that the  
489 maximum value of the AW temperature ( $\theta_{max}$ ) according to the presented data is always observed  
490 in the upper layer of the Eurasian Basin at the depths below the density jump layer but not  
491 exceeding 350 m, while the maximum salinity ( $S_{max}$ ) at sections in the eastern part of the Basin  
492 can be observed at depths greater than 1000 m.

493 One of the key parameters in the analysis of flow dynamics, ~~according to the authors,~~ is the  
 494 distance of the AW core (which can be associated with  $\theta_{max}$ ) from the slope/shelf boundary –  
 495  $X_{\theta_{max}}$  in Table 1. The highest value and the maximum variation of this parameter is observed  
 496 near 126°E and 142°E, e.g. where the slope has a larger curvature (at about 126°E) or where the  
 497 slope/shelf divides into two “channels” (at about 142°E). Taking into account the dependence of  
 498 the current dynamics in the ocean on the bottom topography, the continental slope and the sea  
 499 shelf, in these areas one can expect the meandering of the current, and, as a result, the formation  
 500 of intrusions and eddies, which, like the intrusive layering, can have a significant effect on the  
 501 AW heat and salt content and the volume flow rate (the description of observation of eddies in  
 502 the Eurasian Basin can be found in e.g. Schauer et al., 2002; Dmitrenko et al., 2008; Aagaard et  
 503 al., 2012).

504 A striking feature of the data is a noticeable increase of  $\theta_{max}$  in 2006 at 31°E and 103°E.  
 505 This intensive warming of the AW was first reported in (Polyakov et. al., 2011). The present  
 506 results show that the increase of the temperature of the AW in 2006 was also accompanied by an  
 507 increase of salinity and volume flow rate of the geostrophic current (see the volume flow rate at  
 508 the section along 103°E). ~~According to the authors,~~ this can be caused not only by the warming  
 509 of the AW, but also by an increased inflow of the AW to the Eurasian Basin through the Fram  
 510 Strait and St. Anna Trough.

511 As it can be seen from Table 1, the geostrophic current in the range of 31–126°E is  
 512 characterized by a high variability. The most likely reason for this is that in the range of 31–  
 513 103°E the BSBW enters the Eurasian Basin and starts interacting with the FSBW, which leads to  
 514 a destabilization of the average geostrophic current. Significant increase of the volume flow rate  
 515 of the geostrophic current was observed in 2006: the volume flow rate for the section at 103°E  
 516 exceeds almost 5 times the value of the same parameter at the same section assessed for the data  
 517 of 2008. However, despite the anomalous conditions occurred in 2006, according to the data  
 518 shown in the Table 1 **it can be confidently concluded** that in the process of movement of the AW  
 519 along the continental slope of the Eurasian Basin the volume flow rate of the mean geostrophic  
 520 flow gradually decreases. This fact is particularly well confirmed by the data presented in Table  
 521 1 for 126–159°E: in this area the pattern of the spatial variability of the volume flow rate does  
 522 not change practically for 5 years. Thus a monotonous decrease in the volume flow rate is  
 523 observed with the AW moving away from the inflow zones.

524 Let us turn our attention to the following features of the volume flow rate estimates: high  
 525 volume flow rate estimates at 96°E, 103°E, 107°E, a negative volume flow rate estimate at  
 526 126°E in 2013 and low volume flow rate estimates at 31°E, 60°E, 98°E in 2009 (Table 1).  
 527 Indeed, the AW volume flow rate in the BSBW area of entry into the Eurasian Basin in 2013 was

528 almost equal to the maximum volume flow rate in 2006 (103°E) and was quite high up to the  
 529 longitude 107°E. This phenomenon as well as the intense warming in 2006 can be associated  
 530 with the impact of climate conditions. The negative volume flow rate at 126°E was, ~~according to~~  
 531 ~~the authors,~~ due to the influence of local return flows which can be observed near the slope  
 532 (Pnyushkov et al., 2015). Low FSBW volume flow rate estimates in 2009 are probably  
 533 associated with a strong deviation of the flow from the slope, which may have been resulted in  
 534 an underestimation of the AW volume flow rates due to the small length of the cuts to the north  
 535 (see also below). Another reason may be a sharp decrease in the intensity of the flow of the AW  
 536 through the Fram Strait that most likely took place that year.

537 It is also interesting to analyze the average values of volume flow rate  $V_{mean}$  for  $N$   
 538 transects available within a particular range of longitude/latitude. The mean values of the FSBW  
 539 volume flow rate for the longitude range of 31–92°E is  $V_{mean} = 0.44$  Sv for  $N = 6$ . This estimate  
 540 of volume flow rate is about two times smaller than the estimate of the BSBW mean volume  
 541 flow rate,  $V_{mean} = 0.79$  Sv for  $N = 3$  (see Table 2). The BSBW volume flow rate exceeding nearly  
 542 twice the FSBW volume flow rate results in a dominance of the BSBW pattern of potential  
 543 density contours in the longitude range of 94–107°E, where the both branches of the AW are  
 544 present. Moreover, the sum of the mean values of the FSBW and the BSBW volume flow rate  
 545 geostrophic estimates,  $V_{mean} = (0.44 + 0.79) \cdot 10^6 = 1.23$  Sv, corresponds well to the mean  
 546 geostrophic estimate of volume flow rate for the combined FSBW and BSBW flow within the  
 547 range 94–107°E:  $V_{mean} = 1.09$  Sv.

548 At the section 142°E located at the Lomonosov Ridge between the Amundsen and  
 549 Makarov Basins, the geostrophic estimate of the along-slope volume flow rate of mixed waters  
 550 of the FSBW and the BSBW reduces to  $V_{mean} = 0.28$  Sv for  $N = 9$  versus  $V_{mean} = 0.39$  Sv for  
 551  $N = 10$  at the section 126°E. Most likely the reduction is caused by splitting the AW flow into two  
 552 flows, one of which goes further east along the slope in the Makarov Basin, and the second turns  
 553 north along the Lomonosov Ridge to close ~~cyclonic gyring~~ of the AW around the Nansen and  
 554 Amundsen Basins (Rudels et al., 2015).

555 Finally, at the section 159°E located in the Makarov Basin, the geostrophic estimate of the  
 556 along-slope volume flow rate of mixed waters of the FSBW and the BSBW has further greatly  
 557 reduced down to  $V_{mean} = 0.026$  Sv for  $N = 2$ , which is of more than one order of magnitude  
 558 smaller than that in the Nansen and Amundsen Basins. Despite the low statistical significance of  
 559 the latter estimate (due to small value of  $N = 2$ ) one may conclude that the major part of the AW

560 entering the Arctic Ocean circulates cyclonically within the Nansen and Amundsen Basins, and  
 561 only its small part flows to the Makarov Basin (Rudels et al., 2015; Rudels, 2015). However,  
 562 additional studies using more CTD data are required to confirm this result.

563 For the conclusion of the section, let us compare the estimates of volume flow rate  
 564 presented in Table 1 with the estimates in other works. Based on the measurements of current  
 565 velocities in the area of the West Spitsbergen Current near the Fram Strait, it was found that  
 566 approximately 3 Sv of the AW flow into the Arctic Basin (Beszczynska-Möller et. al., 2012).  
 567 These waters of Atlantic origin are divided into three "branches", one of which enters the Barents  
 568 Sea, the other flows through the Fram Strait into the Nansen Basin, and the third branch recycles,  
 569 reverses direction and approaches the West Greenland Current. The volume flow rate of the total  
 570 AW flow, which enters the Barents Sea and the Nansen Basin, does not exceed 2–2.5 Sv, and  
 571 therefore, taking into account the relaxation of the AW as it moves in the Arctic Basin, the total  
 572 volume flow rate of the FSBW and BSBW in the Eurasian Basin can be close to 2 Sv. The same  
 573 estimate, 2 Sv, for the sum of the FSBW and BSBW is suggested in (Rudels et. al., 1994).  
 574 According to our calculations, the total volume flow rate of the FSBW and BSBW equal to 2.23  
 575 Sv was obtained only in 2006, when a strong warming of the AW was observed. Hence it cannot  
 576 be excluded that the assessments obtained in this paper may in some cases be somewhat  
 577 underestimated. According to the authors, this may be due to the fact that the sections along the  
 578 longitudes 31°E and 103°E (see Fig. 1) are no longer than 100 km, and their vertical scale is only  
 579 1000 m. Actually, at the section along the longitude 31°E (Fig. 2, upper panel) only a part of the  
 580 FSBW is observed, and at the section along the longitude 103°E (Fig. 2, lower panel) only the  
 581 upper area of the BSBW is recorded. Therefore, it is reasonable to assume that the estimates  
 582 obtained characterize, in some cases, the volume flow rates of the FSBW and BSBW in the  
 583 areas, where the velocities have maximum values. Indeed, estimating the average velocities as  
 584  $\bar{U}=V/S$  (where  $S$  is the area of the cross section, which was used to calculate the volume flow  
 585 rate) we get about 1.5 cm/s in the first case (Fig. 2, upper panel), and about 4.5 cm/s in the  
 586 second case (Fig. 2, lower panel). These are rather high values for the average velocities in the  
 587 intermediate layer of the Nansen Basin (see, e.g., Aagaard, 1981).

588

589 Table 1. Characteristics of the Atlantic Water flow in the course of its propagation along  
 590 continental slope of the Eurasian Basin of the Arctic Ocean. *Dist* is the along-slope distance from  
 591 the Fram Strait;  $\theta_{max}$  is the maximum temperature;  $\sigma_{\theta}(Z_{\theta max})$ ,  $S(Z_{\theta max})$ ,  $Z_{\theta max}$ , and  $X_{\theta max}$  are the  
 592 values of potential density, salinity, depth, and lateral displacement from the slope for the point  
 593  $\theta_{max}$ ;  $S_{max}$  and  $Z_{Smax}$  are the same as  $\theta_{max}$  and  $Z_{\theta max}$  but for the salinity;  $V$  is the geostrophic  
 594 estimate of the volume flow rate. The last row in the Table presents the characteristics of the



595 return flow of the AW by the Lomonosov Rigde at the longitude 140°E and latitude 86.5°N  
 596 (PS96, see Fig. 1).

| <i>Exp</i> | <i>Lon</i><br>[°E] | <i>Dist</i><br>[km] | $\theta_{max}$<br>[°C] | $\sigma_{\theta}(Z_{\theta_{max}})$<br>[kg/m <sup>3</sup> ] | $S(Z_{\theta_{max}})$<br>[psu] | $Z_{\theta_{max}}$<br>[m] | $X_{\theta_{max}}$<br>[km] | $S_{max}$<br>[psu] | $Z_{S_{max}}$<br>[m] | $V$ [Sv] |
|------------|--------------------|---------------------|------------------------|-------------------------------------------------------------|--------------------------------|---------------------------|----------------------------|--------------------|----------------------|----------|
| NABOS06    | 31                 | 404                 | 5.670                  | 27.579                                                      | 34.980                         | 42.0                      | -11                        | 35.099             | 72.0                 | 0.567    |
| NABOS08    | 31                 | 404                 | 4.883                  | 27.771                                                      | 35.103                         | 101.5                     | 0                          | 35.105             | 175.5                | 0.801    |
| NABOS09    | 31                 | 404                 | 3.691                  | 27.818                                                      | 34.999                         | 89.0                      | 0                          | 35.002             | 91.0                 | 0.095    |
| NABOS09    | 60                 | 856                 | 2.503                  | 27.891                                                      | 34.951                         | 175.0                     | 10                         | 34.981             | 362.5                | 0.128    |
| NABOS13    | 90                 | 1290                | 2.600                  | 27.903                                                      | 34.975                         | 250.0                     | 41                         | 34.996             | 333.0                | 0.464    |
| PS96       | 92                 | 1322                | 2.786                  | 27.875                                                      | 34.960                         | 271.0                     | 33                         | 34.968             | 329.0                | 0.583    |
| NABOS15    | 94                 | 1355                | 2.445                  | 27.946                                                      | 35.012                         | 331.0                     | 33                         | 35.015             | 365.0                | 0.472    |
| NABOS13    | 96                 | 1388                | 2.548                  | 27.902                                                      | 34.969                         | 207.0                     | 70                         | 34.978             | 264.0                | 2.059    |
| NABOS09    | 98                 | 1421                | 2.300                  | 27.906                                                      | 34.948                         | 220.5                     | 79                         | 34.971             | 344.5                | 0.088    |
| NABOS05    | 103                | 1561                | 2.029                  | 27.870                                                      | 34.876                         | 179.5                     | 39                         | 34.934             | 308.5                | 0.317    |
| NABOS06    | 103                | 1561                | 2.528                  | 27.888                                                      | 34.950                         | 220.0                     | 50                         | 34.978             | 260.0                | 2.228    |
| NABOS08    | 103                | 1561                | 1.980                  | 27.886                                                      | 34.891                         | 201.5                     | 60                         | 34.929             | 325.0                | 0.417    |
| NABOS09    | 103                | 1561                | 1.984                  | 27.913                                                      | 34.925                         | 244.5                     | 50                         | 34.951             | 364.5                | 0.872    |
| NABOS13    | 103                | 1561                | 2.278                  | 27.904                                                      | 34.942                         | 215.0                     | 80                         | 34.956             | 419.0                | 1.587    |
| NABOS13    | 107                | 1695                | 1.903                  | 27.937                                                      | 34.945                         | 359.0                     | 120                        | 34.948             | 404.0                | 1.774    |
| NABOS02    | 126                | 2104                | 1.406                  | 27.938                                                      | 34.902                         | 324.0                     | 243                        | 34.932             | 2061.0               | 0.052    |
| NABOS03    | 126                | 2102                | 1.341                  | 27.941                                                      | 34.899                         | 336.0                     | 342                        | 34.921             | 1886.0               | 0.413    |
| NABOS04    | 126                | 2102                | 1.770                  | 27.906                                                      | 34.896                         | 271.0                     | 87                         | 34.925             | 2431.0               | 0.611    |
| NABOS05    | 126                | 2102                | 1.695                  | 27.936                                                      | 34.926                         | 359.0                     | 227                        | 34.935             | 2841.0               | 0.754    |
| NABOS06    | 126                | 2102                | 1.905                  | 27.923                                                      | 34.930                         | 284.0                     | 193                        | 34.960             | 968.0                | 0.774    |
| NABOS07    | 126                | 2102                | 2.085                  | 27.907                                                      | 34.928                         | 266.0                     | 242                        | 34.942             | 340.0                | 0.600    |
| NABOS08    | 126                | 2102                | 2.195                  | 27.885                                                      | 34.911                         | 206.0                     | 235                        | 34.939             | 365.0                | 0.310    |
| NABOS09    | 126                | 2102                | 1.907                  | 27.909                                                      | 34.913                         | 316.5                     | 33                         | 34.932             | 1018.0               | 0.404    |
| NABOS13    | 126                | 2102                | 1.946                  | 27.937                                                      | 34.949                         | 346.0                     | 228                        | 34.951             | 428.0                | -0.209   |
| NABOS15    | 126                | 2102                | 1.653                  | 27.918                                                      | 34.898                         | 246.0                     | 400                        | 34.942             | 3816.0               | 0.224    |
| NABOS03    | 142                | 2456                | 1.089                  | 27.912                                                      | 34.841                         | 269.0                     | 41                         | 34.862             | 1000.0               | 0.063    |
| NABOS04    | 142                | 2456                | 1.401                  | 27.909                                                      | 34.865                         | 281.0                     | 0                          | 34.907             | 1608.0               | 0.209    |
| NABOS05    | 142                | 2456                | 1.492                  | 27.906                                                      | 34.870                         | 284.0                     | 100.0                      | 34.906             | 1550.0               | 0.264    |
| NABOS06    | 142                | 2456                | 1.981                  | 27.874                                                      | 34.876                         | 234.0                     | 111.0                      | 34.960             | 1016.0               | 0.603    |
| NABOS07    | 142                | 2456                | 1.855                  | 27.879                                                      | 34.870                         | 231.0                     | 0.0                        | 34.920             | 2064.0               | 0.087    |
| NABOS08    | 142                | 2456                | 1.599                  | 27.915                                                      | 34.890                         | 260.5                     | 200.0                      | 34.908             | 347.0                | 0.226    |
| NABOS09    | 142                | 2456                | 1.704                  | 27.915                                                      | 34.900                         | 253.5                     | 101.0                      | 34.917             | 1082.0               | 0.215    |
| NABOS13    | 142                | 2456                | 1.475                  | 27.940                                                      | 34.909                         | 331.0                     | 115.0                      | 34.926             | 1150.0               | 0.181    |
| NABOS15    | 142                | 2456                | 1.353                  | 27.936                                                      | 34.892                         | 326.0                     | 106.0                      | 34.913             | 1372.0               | 0.633    |
| NABOS07    | 159                | 2783                | 1.424                  | 27.887                                                      | 34.839                         | 255.0                     | 0.0                        | 34.880             | 1075.0               | -0.006   |
| NABOS08    | 159                | 2783                | 1.383                  | 27.893                                                      | 34.843                         | 245.0                     | 0.0                        | 34.889             | 1265.5               | 0.058    |
| PS96back   | 140E<br>86.5N      | 3178                | 1.812                  | 27.890                                                      | 34.880                         | 219.0                     | ≈ 700                      | 34.902             | 472.0                | -0.088   |

597

598 Table 2. Geostrophic estimates of the volume flow rate for near-bottom gravity flow of the  
 599 Barents Sea Branch of Atlantic Water (BSBW) on zonal transects across the St. Anna Trough.

600

| <i>Exp</i>      | NABOS09 | NABOS13 | NABOS15 |
|-----------------|---------|---------|---------|
| <i>Lat</i> [°N] | 81.00   | 81.33   | 81.41   |
| <i>V</i> [Sv]   | 0.892   | 0.727   | 0.755   |

601

602 3.3. *Inter-annual variability of the AW temperature-salinity indices and the volume flow rate*

603 Within the NABOS project, in accordance with Table 1, the cross-slope CTD transects at  
 604 103°E, 126°E, and 142°E were repeatedly performed for a number of annual campaigns: 2005,  
 605 2006, 2008 and 2013 (103°E), 2002–2009, 2013 and 2015 (126°E), 2003–2009, 2013, and 2015  
 606 (142°E). The repeated transects may contain some information on inter-annual variability of the  
 607 AW, and we attempted to explore such a possibility.

608 Time series of the maximum temperature of the AW,  $\theta_{max}$ , and the related values of salinity  
 609  $S(\theta_{max})$  and potential density anomaly  $\sigma_{\theta}(\theta_{max})$  (Fig. 10) show that the period of 2006–2008 was  
 610 characterized by an increased temperature of the AW in the eastern part of the Eurasian Basin.  
 611 The temperature excess during this period was as large as about 0.6–1.0 °C relative to the years  
 612 2002–2003 and 0.3–0.6 °C relative to the years 2013–2015. During the whole NABOS period  
 613 2002–2015, the AW temperature in the eastern part of the Eurasian Basin had slightly increased  
 614 by 0.2–0.3 °C. The time series of corresponding values of salinity  $S(\theta_{max})$  displayed in 2006 local  
 615 maxima at the transects 126°E and 142°E, and the absolute maximum at the transect 103°E; the  
 616 salinity excess for the maxima largely decreased with the longitude from approximately 0.06 psu  
 617 at 103°E to less than 0.01 psu at 142°E. Note, that the time series of  $\theta_{max}$  had the absolute  
 618 maximum in 2006–2008 that can be interpreted as a result of heat impulse of the early 2000-ies  
 619 (Polyakov et al., 2011). In accordance with our analysis the time series of  $\theta_{max}$  had a maximum  
 620 in 2013 but only at 103°E (see Table 1 and Fig.10). The time series of  $S(\theta_{max})$  display an increase  
 621 of AW salinity in 2006–2008 and 2013 also, that can be referred to as a AW salinization in early  
 622 2000-ies. The change of salinity of AW at 142°E in time also draws attention to the following  
 623 aspects: the salinity increases almost monotonously in the period from 2003 to 2013. How can  
 624 such behavior of salinity be explained is not clear. It is also worth noting that the maxima of  $\theta_{max}$   
 625 and  $S(\theta_{max})$  in 2006–2008 and 2013 (at 103°E) were accompanied by the volume flow rate highs.

#### 626 **4. Summary**

627 The estimates of  $\theta$ - $S$  indices and of the volume flow rate of the current carrying the AW in  
 628 the Eurasian Basin were obtained. The estimates were based on the analysis of CTD data  
 629 collected within the NABOS program in 2002–2015 including 33 transects in the Eurasian  
 630 Basin, 2 transects in the Makarov Basin and 4 transects in the St. Anna Trough; additionally  
 631 CTD transect PS-96 was considered.

632 First of all, the variability of the thermohaline pattern on the AW pathway along the slope  
 633 of the Eurasian Basin was investigated. It was found that the FSBW was satisfactorily identified  
 634 at all transects, including the two transects in the Makarov Basin (159°E), while the cold waters  
 635 at the transects along longitudes 126°E, 142°E and 159°E, which can be associated with the

636 influence of the BSBW, were observed in the depth range below 800 m and had little effect on  
 637 the spatial structure of isopycnic surfaces. To study the transformation of the moving along the  
 638 slope BSBW the  $\theta$ - $S$  analysis was applied. It was shown, that the BSBW, which is characterized  
 639 by the knee-shape diagram in coordinates  $\theta$ ,  $S$  and  $\sigma_\theta$ ,  $S$  (see Fig.8), does not reach the longitude  
 640  $126^\circ\text{E}$ . Thus, a reasonable assumption, which could be made about the movement of the BSBW  
 641 over long distances in the form of along-slope gravity flow, is not confirmed by the analysis of a  
 642 large amount of empirical data. To clarify the reasons for the BSBW missing at  $126^\circ\text{E}$  and to the  
 643 east of the slope additional field measurements are required, namely, CTD transects across the  
 644 slope between the longitudes  $103^\circ\text{E}$  and  $126^\circ\text{E}$ .

645 A special attention was paid to the study of the variability of the volume flow rate of the  
 646 AW propagating along the continental slope of the Eurasian Basin. The volume flow rate of the  
 647 geostrophic flow was calculated using the dynamic method. The estimates are given in tabular  
 648 form. An interpretation of the spatial and temporal variability of hydrological parameters  
 649 characterizing the flow of the AW in the Eurasian Basin is presented.

650 The performed analysis showed that the geostrophic volume flow rate decreases  
 651 significantly farther away from areas of the AW inflow in the Eurasian Basin. This decrease may  
 652 be primarily due to a decrease of the flow velocity. Thus, on the basis of direct velocity  
 653 measurements, it was shown that the mean velocity of the current along the continental slope  
 654 gradually decreases (Pnyushkov et al., 2015). Another reason is the weakening of the horizontal  
 655 gradients of potential density caused by the advection of water masses in the direction  
 656 perpendicular to the eastward geostrophic flow. Such advection can be attributed to the processes  
 657 of formation of intrusions and eddies, which are typically observed in the intermediate and deep  
 658 layers of the Eurasian Basin.

659 A study of the temporal variability of hydrological parameters and of the volume flow rate  
 660 is summarized as follows. The time series of  $\theta_{max}$  had an absolute maximum in 2006–2008 that  
 661 can be interpreted as a result of heat impulse in the early 2000-ies (Polyakov et al., 2011). In  
 662 accordance with our analysis the time series of  $\theta_{max}$  had a maximum in 2013 but only at the  
 663 longitude  $103^\circ\text{E}$  (see also Table 1 and Fig.10). The time series of  $S(\theta_{max})$  also display an increase  
 664 of AW salinity in 2006–2008 and 2013, that can be referred to as a AW salinization in the early  
 665 2000-ies. The change of salinity of AW at  $142^\circ\text{E}$  in time also draws attention to the following  
 666 aspects: the salinity increases almost monotonously in the period from 2003 to 2013. How can  
 667 such behavior of salinity be explained is not clear. It is important to underline also that the  
 668 maxima of  $\theta_{max}$  and  $S(\theta_{max})$  in 2006-2008 and 2013 ( $103^\circ\text{E}$ ) were accompanied by the volume  
 669 flow rate highs.

670        **A comparison** of the presented results with the results obtained in the well-known paper  
671 (Rudels et al., 2015) reveals some differences in interpretation. It was suggested in (Rudels et al.,  
672 2015) that the BSBW supplies the major part of the AW to the Amundsen, Makarov and  
673 Canadian Basins, while the FSBW remains almost fully in the Nansen Basin. The analysis of the  
674 data performed in the present work showed that the thermohaline structure of the water masses in  
675 the region east of the inflow of the BSBW in the Nansen Basin (at around 103°E) is more  
676 complicated due to the interaction between the two branches of the AW. Large slopes of  
677 isopycnic surfaces on the horizons below 800 m (the depth range of the BSBW) and intense  
678 perturbations of the density field typical of eddy structures are observed on the transects in this  
679 area. However, already at 142°E the core of the directed to the east geostrophic current is located  
680 in the upper active layer and the  $\theta$ - $S$  indices of waters in the current area correspond to the  
681 FSBW. Thus, there is a certain paradox: on the one hand, the mean geostrophic volume flow rate  
682 of BSBW is higher than the mean volume flow rate of FSBW (see Section 3.2), and on the other  
683 hand, the BSBW, which is characterized by the knee-shape diagram in coordinates  $\theta$ ,  $S$  and  $\sigma_\theta$ ,  
684  $S$ , does not reach 126°E. It should also be emphasized that the weak geostrophic current in the  
685 Makarov Basin at 159°E is confined to the upper active layer (up to 500 m), and the  
686 thermohaline characteristics of the flow also correspond to the  $\theta$ - $S$  indices of the FSBW. Taking  
687 into account that the volume flow rate values in the Makarov Basin are much smaller than the  
688 volume flow rate values found in the Eurasian Basin, it can be concluded that the major part of  
689 the AW entering the Nansen Basin (and not only the FSBW) remains in the Eurasian Basin, and  
690 only a small part of the AW enters the Makarov and Canadian Basin. Exceptions may arise when  
691 strong inflows of the BSBW into the Nansen Basin occur due to the influence of sharp climatic  
692 changes on the thermohaline structure of waters in the central part of the Arctic Ocean.

693        This study is a natural step in the research of the spatial and temporal variability of the  
694 geostrophic current carrying the AW along the continental slope of the Eurasian Basin. The table  
695 of hydrological parameters presented in the paper may be used as a required reference material  
696 for comparative estimates of the variability amplitudes of the  $\theta$ - $S$  indices arising from climate  
697 change in the Arctic Basin. The continuation of similar studies based on new CTD data from the  
698 NABOS program can facilitate answering the addressed in this study important questions about  
699 the transformation and advection of the AW.

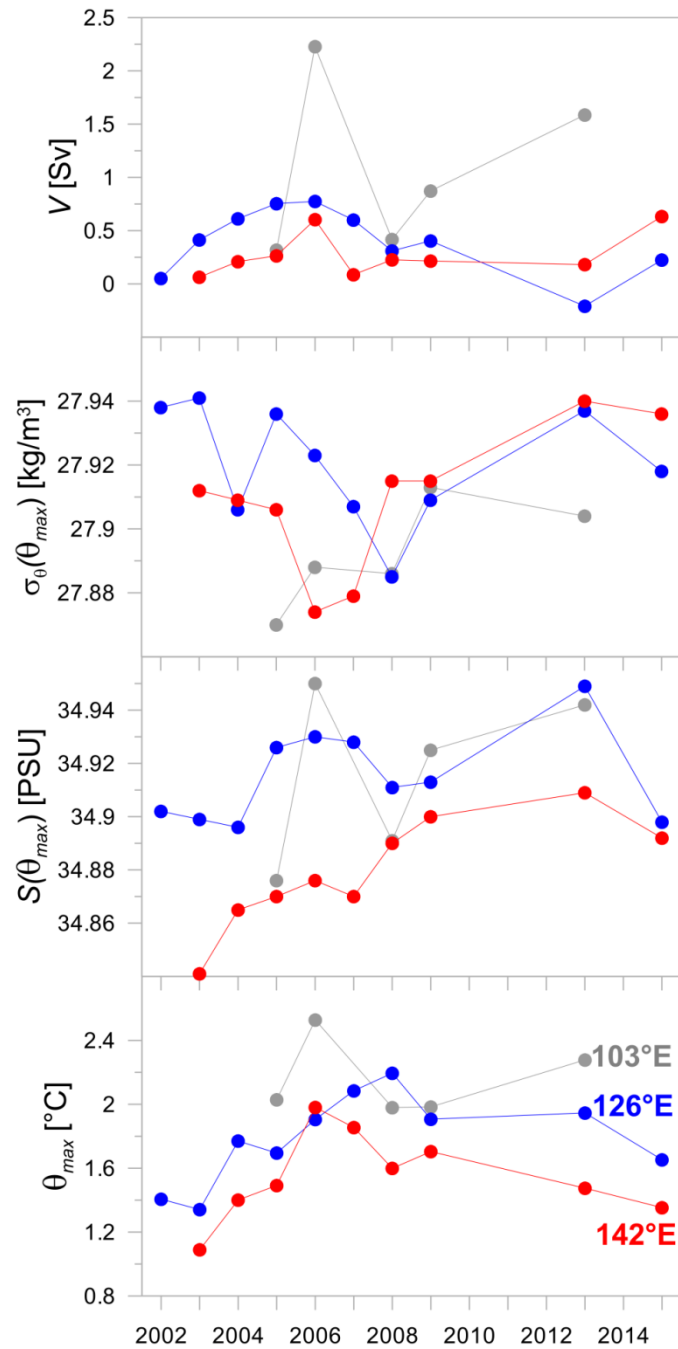

700

701 Fig. 10. Interannual variability of the maximum temperature  $\theta_{max}$  and the related values of  
 702 salinity  $S(\theta_{max})$ , potential density anomaly  $\sigma_{\theta}(\theta_{max})$  and volume flow rate  $V$  on the cross-slope  
 703 transects at 103°E, 126°E and 142°E.

704 *Acknowledgments.* This research, including the approach development, data processing and  
 705 interpretation, performed by Nataliya Zhurbas, was funded by Russian Science Foundation,  
 706 project no. 17-77-10080. Natalia Kuzmina ( $\theta$ - $S$  analysis, participation in discussion) was  
 707 supported by the state assignment of the Shirshov Institute of Oceanology RAS (theme no. 0149-  
 708 2019-0003).

709 **References**

- 710 Aagaard, K.: On the deep circulation of the Arctic Ocean, *Deep-Sea Res.*, 28, 251–268, 1981.
- 711 Aagaard, K., Andersen, R., Swift, J., and Johnson, J.: A large eddy in the central Arctic Ocean,  
712 *Geophys. Res. Lett.*, 35, L09601, doi: 10.1029/2008GL033461, 2008.
- 713 Aksenov, Y., Ivanov, V. V., Nurser, A. J. G., Bacon, S., Polyakov, I. V., Coward, A. C.,  
714 Naveira-Garabato, A. C., and Beszczynska-Moeller, A.: The Arctic Circumpolar Boundary  
715 Current, *J. Geophys. Res.*, 116, C09017, 1–28, doi:10.1029/2010JC006637, 2011.
- 716 Arneborg, L., Fiekas, V., Umlauf, L., and Burchard, H.: Gravity current dynamics and  
717 entrainment – A process study based on observations in the Arkona Basin, *J. Phys. Oceanogr.*,  
718 37, 2094–2113, doi:10.1175/JPO3110.1, 2007.
- 719 Beszczynska-Möller, A., Fahrbach, E., Schauer, U., and Hansen, E.: Variability in Atlantic water  
720 temperature and transport at the entrance to the Arctic Ocean, 1997–2010, *ICES Journal of*  
721 *Marine Science*, 69(5), 852–863, doi: 10.1093/icesjms/fss056, 2012.
- 722 Dmitrenko, I. A., Kirillov, S. A., Ivanov, V. I., and Woodgate, R.: Mesoscale Atlantic water  
723 eddy off the Laptev Sea continental slope carries the signature of upstream interaction, *J.*  
724 *Geophys. Res.*, 113, C07005, doi: 10.1029/2007JC004491, 2008.
- 725 Dmitrenko, I. A., Rudels, B., Kirillov, S. A., Aksenov, Y. O., Lien V. S., Ivanov, V. V., Schauer,  
726 U., Polyakov, I. V., Coward, A., and Barber, D. J.: Atlantic Water flow into the Arctic Ocean  
727 through the St. Anna Trough in the northern Kara Sea, *J. Geophys. Res.: Oceans*, 120(7),  
728 5158–5178, doi: 10.1002/2015JC010804, 2015.
- 729 Fahrbach, E., Meincke, J., Osterhus, S., Rohardt, G., Schauer, U., Tverberg, V., and Verduin, J.:  
730 Direct measurements of volume transport through Fram Strait, *Polar Res.*, 20(2), 217–224,  
731 doi: 10.1111/j.1751-8369.2001.tb00059.x, 2001.
- 732 Fedorov, K. N.: *Physical Nature and Structure of Oceanic Fronts*, Gidrometeoizdat, Leningrad,  
733 296 pp., 1983 (in Russian).
- 734 Ivanov, V. V., and Shapiro, G. I.: Formation of dense water cascade in the marginal ice zone in  
735 the Barents Sea, *Deep-Sea Res. I*, 52, 1699–1717, doi: 10.1016/j.dsr.2005.04.004, 2005.
- 736 Ivanov, V., and Golovin, P.: Observations and modelling of dense water cascading from  
737 northwestern Laptev Sea shelf, *J. Geophys. Res.*, 112, C09003, doi:10.1029/2006JC003882,  
738 2007.
- 739 Ivanov, V. V., and Aksenov, E. O.: Atlantic Water transformation in the Eastern Nansen Basin:  
740 observations and modelling, *Arctic and Antarctic Research*, 1(95), 72–87, 2013 (in Russian).
- 741 Joyce, T. M.: A note on the lateral mixing of water masses, *J. Phys. Oceanogr.*, 7(4), 626–629,  
742 1980.

- 743 Kuzmina, N. P.: On the parameterization of interleaving and turbulent mixing using CTD data  
744 from the Azores Frontal Zone, *J. Mar. Syst.*, 23(4), 285–302, 2000.
- 745 Kuzmina, N., Rudels, B., Zhurbas, V., and Stipa, T.: On the structure and dynamical features of  
746 intrusive layering in the Eurasian Basin in the Arctic Ocean, *J. Geophys. Res.*, 116, C00D11,  
747 doi: 10.1029/2010JC006920, 2011.
- 748 Kuzmina, N. P., Zhurbas, N. V., and Rudels B.: Structure of intrusions and fronts in the deep  
749 layer of the Eurasian Basin and Makarov Basin (Arctic), *Oceanology*, 53(4), 410–421, doi:  
750 10.1134/S0001437013040061, 2013.
- 751 Kuzmina, N. P., Zhurbas, N. V., Emelianov, M. V., and Pyzhevich, M. L.: Application of  
752 interleaving Models for the Description of intrusive Layering at the Fronts of Deep Polar  
753 Water in the Eurasian Basin (Arctic), *Oceanology*, 54(5), 557–566, doi:  
754 10.1134/S0001437014050105, 2014.
- 755 Kuzmina, N. P.: Generation of large-scale intrusions at baroclinic fronts: an analytical  
756 consideration with a reference to the Arctic Ocean, *Ocean Sci.*, 12, 1269–1277, doi:  
757 10.5194/os-12-1269-2016, 2016.
- 758 Kuzmina, N. P., Skorokhodov, S. L., Zhurbas, N. V., and Lyzhkov, D. A.: On instability of  
759 geostrophic current with linear vertical shear at length scales of interleaving, *Izv. Atmos.*  
760 *Ocean. Phys.*, 54(1), 47–55, doi: 10.1134/S0001433818010097, 2018.
- 761 Merryfield, W. J.: Intrusions in Double-Diffusively Stable Arctic Waters: Evidence for  
762 Differential mixing?, *J. Phys. Oceanogr.*, 32, 1452–1459, 2002.
- 763 Pfirman, S.L., Bauch, D, and Gammersrod, T.: The northern Barents Sea: water mass  
764 distribution and modification., in *The Polar Oceans and Their Role in Shaping the Global*  
765 *Environment*, O.M. Johannessen, R.D. Muench, and J.E. Overland, eds., American Geophysical  
766 Union, Geophysical Monograph 85, 77-94.
- 767 Pnyushkov, A. V., Polyakov, I. V., Ivanov, V. V., Aksenov, Ye., Coward, A., Janout, M., and  
768 Rabe, B.: Structure and variability of the boundary current in the Eurasian Basin of the Arctic  
769 Ocean, *Deep-Sea Res. I*, 101, 80–97, doi: 10.1016/j.dsr.2015.03.001, 2015.
- 770 Polyakov, I. V., Beszczynska, A., Carmack, E. C., Dmitrenko, I. A., Fahrbach, E., Frolov, I. E.,  
771 Gerdes, R., Hansen, E., Holfort, J., Ivanov, V. V., Johnson, M. A., Karcher, M., Kauker, F.,  
772 Morison, J., Orvik, K. A., Schauer, U., Simmons, H. L., Skagseth, Ø., Sokolov, V. T., Steele,  
773 M., Timokhov, L. A., Walsh, D., and Walsh, J. E.: One more step toward a warmer Arctic,  
774 *Geophys. Res. Lett.*, 32, L17605, doi: 10.1029/2005GL023740, 2005.
- 775 Polyakov, I. V., Alexeev, V. A., Ashik, I. M., Bacon, S., Beszczynska-Möller, A., Carmack, E.  
776 C., Dmitrenko, I. A., Fortier, L., Gascard, J.-C., Hansen, E., Hölemann, J., Ivanov, V. V.,  
777 Kikuchi, T., Kirillov, S., Lenn, Y.-D., McLaughlin, F. A., Piechura, J., Repina, I., Timokhov,

- 778 L. A., Walczowski, W., and Woodgate, R.: Fate of Early 2000s Arctic Warm Water Pulse,  
779 Bulletin of the American Meteorological Society, 92(5), 561–566, doi:  
780 10.1175/2010BAMS2921.1, 2011.
- 781 Polyakov, I. V., Pnyushkov, A., Rember, R., Ivanov, V., Lenn, Y-D., Padman, L., and Carmack,  
782 E. C.: Mooring-based observations of the double-diffusive staircases over the Laptev Sea, J.  
783 Phys. Oceanogr., 42, 95–109, doi: 10.1175/2011JPO4606.1, 2012.
- 784 Rudels, B., Jones, E. P., Anderson, L. G., and Kattner, G.: On the intermediate depth waters of  
785 the Arctic Ocean, in: The Role of the Polar Oceans in Shaping the Global Climate, edited by:  
786 Johannessen, O. M., Muench, R. D., and Overland, J. E., American Geophysical Union,  
787 Washington, DC, 33–46, 1994.
- 788 Rudels, B., Björk, G., Muench, R. D., and Schauer, U.: Double-diffusive layering in the Eurasian  
789 Basin of the Arctic Ocean, J. Mar. Syst., 21(1–4), 3–27, doi: 10.1016/S0924-7963(99)00003-  
790 2, 1999.
- 791 Rudels, B., Jones, E. P., Schauer, U., and Eriksson, P.: Atlantic sources of the Arctic Ocean  
792 surface and halocline water, Polar research, 23(2), 181–208, doi: 10.1111/j.1751-  
793 8369.2004.tb00007.x, 2006.
- 794 Rudels, B., Kuzmina, N., Schauer, U., Stipa, T., and Zhurbas, V.: Double-diffusive convection  
795 and interleaving in the Arctic Ocean – Distribution and importance, Geophysica, 45(1–2),  
796 199–213, 2009.
- 797 Rudels, B.: Arctic Ocean circulation, processes and water masses: A description of observations  
798 and ideas with focus on the period prior to the International Polar Year 2007–2009, Progress  
799 in Oceanography, 132, 22–67, doi: 10.1016/j.pocean.2013.11.006, 2015.
- 800 Rudels, B., Korhonen, M., Schauer, U., Pisarev, S., Rabe, B., and Wisotzki A.: Circulation and  
801 transformation of Atlantic water in the Eurasian Basin and the contribution of the Fram Strait  
802 inflow branch to the Arctic Ocean heat budget, Progress in Oceanography, 132, 128–152, doi:  
803 10.1016/j.pocean.2014.04.003, 2015.
- 804 Schauer, U., Muench, R. D., Rudels, B., and Timokhov, L.: Impact of eastern Arctic shelf waters  
805 on the Nansen Basin intermediate layers, J. Geophysical Res., 102(C2), 3371–3382, 1997.
- 806 Schauer, U., Rudels, B., Jones, E. P., Anderson, L. G., Muench, R. D., Björk, G., Swift, J. H.,  
807 Ivanov, V., and Larsson, A.-M.: Confluence and redistribution of Atlantic water in the  
808 Nansen, Amundsen and Makarov basins, Ann. Geophys., 20, 257–273, doi: 10.5194/angeo-  
809 20-257-2002, 2002.
- 810 Stern, M. E.: Lateral mixing of water masses, Deep-Sea Res., 14, 747–753, doi:10.1016/S0011-  
811 7471(67)80011-1, 1967.



- 812 Walsh, D., and Carmack, E.: The nested structure of Arctic thermohaline intrusions, *Ocean*  
813 *Model.*, 5, 267–289, doi: 10.1016/S1463-5003(02)00056-2, 2003.
- 814 Walsh D., Polyakov I., Timokhov L., and Carmack E.: Thermohaline structure and variability in  
815 the eastern Nansen Basin as seen from historical data, *Journal of Marine Research*, 65, 685–  
816 714, 2007.
- 817 Zhurbas, N. V.: On the eigenvalue spectra for a model problem describing formation of the  
818 large-scale intrusions in the Arctic Basin, *Fundamentalnaya I Prikladnaya Gidrofizika*, 11(1),  
819 40–45, doi: 10.7868/S2073667318010045, 2018.
- 820 Zhurbas, N. V.: Estimates of transport and heat content of the Atlantic Water while its  
821 propagation along the Eurasian Basin slope, *Russian Meteorology and Hydrology*, 2019  
822 (Submitted).
- 823 Zhurbas, V. M., Kuzmina, N. P., Ozmidov, R. V., Golenko, N. N., and Paka, V. T.:  
824 Manifestation of subduction in thermohaline fields of vertical fine structure and horizontal  
825 mesostructure in frontal zone of Azores Current, *Okeanologiya+*, 33, 321–326, 1993.
- 826 Zhurbas, V., Elken, J., Paka, V., Piechura, J., Väli, G., Chubarenko, I., Golenko, N., and  
827 Shchuka, S.: Structure of unsteady overflow in the Słupsk Furrow of the Baltic Sea, *J.*  
828 *Geophys. Res. – Oceans*, 117, C04027, doi:10.1029/2011JC007284, 2012.
